# Supplementary material
Source: PubMed Central journal article supplement (PMC5803353)
Supplement: NIHMS931057-supplement-2.pdf [file NIHMS931057-supplement-2.pdf]

## SUPPORTING INFORMATION

# Development of dual casein kinase 1 $\delta$ /1 $\epsilon$ (CK1 $\delta$ / $\epsilon$ ) inhibitors for treatment of breast cancer

*Andrii Monastyrskyi,<sup>†</sup> Napon Nilchan,<sup>†</sup> Victor Quereda,<sup>‡</sup> Yoshihiko Noguchi,<sup>†</sup> Claudia Ruiz,<sup>‡</sup> Wayne Grant,<sup>‡</sup> Michael D. Cameron,<sup>‡</sup> Derek R. Duckett<sup>‡</sup> and William R. Roush<sup>\*,†</sup>*

<sup>†</sup>Department of Chemistry, Scripps Florida, 130 Scripps Way, Jupiter, FL 33458, United States.

<sup>‡</sup>Department of Molecular Therapeutics, Scripps Florida, 130 Scripps Way, Jupiter, FL 33458, United States

| <b>Table of Contents</b>                                                                                 | <b>Page Number</b> |
|----------------------------------------------------------------------------------------------------------|--------------------|
| Docking overlay of PF670462 and compound 28                                                              | SI-2               |
| Compounds characterization                                                                               | SI-3 to SI-17      |
| NMR spectra, <b>28</b> , ( <sup>1</sup> H, <sup>13</sup> C, DEPT-135, <sup>19</sup> F, COSY, HSQC, HMBC) | SI-18 to SI-24     |
| Summary table with biological and ADME data for all tested compounds                                     | SI-25 to SR-26     |
| Kinase selectivity profile of compound 17                                                                | SI-27              |

PDB coordinates of CK1 $\delta$  (PDB: 3UYT) with 17 and 28 can be found in the supporting information section.

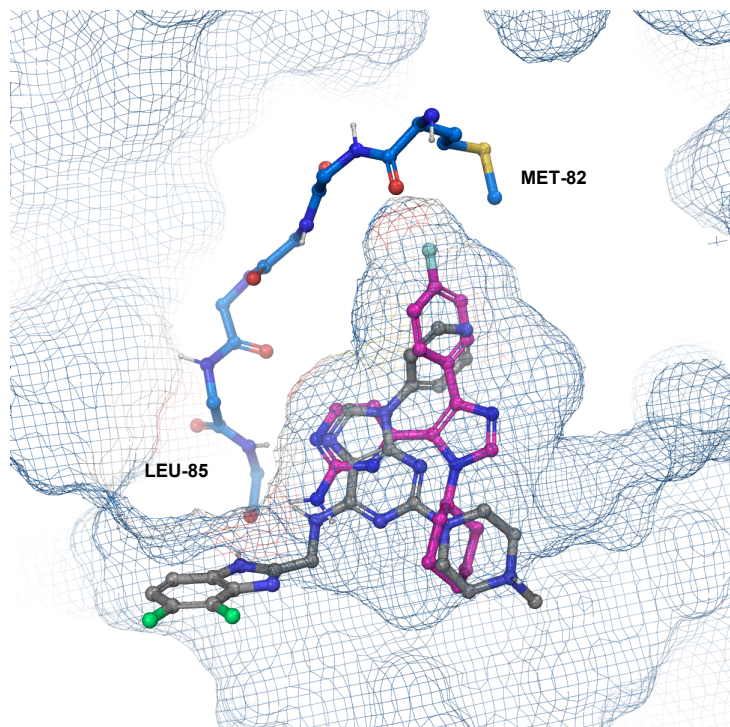

**SI-1. A,** docking pose of 28 (grey) and PF670462 (pink) in the CK1 $\delta$  active site (mesh representation)

## Compounds characterization

*N*-((4,5-difluoro-1*H*-benzo[d]imidazol-2-yl)methyl)-9-methyl-2-morpholino-9*H*-purin-6-amine (**11**). Compound **11** was prepared using general procedure in 40% yield over two steps as a white solid. <sup>1</sup>H NMR (700 MHz, DMSO-*d*<sub>6</sub>) δ 12.52 (s, 1H), 8.04 (s, 1H), 7.79 (s, 1H), 7.23 – 7.10 (m, 2H), 4.81 (s, 2H), 3.58 (s, 3H), 3.50 (d, *J* = 30.5 Hz, 8H). <sup>13</sup>C NMR (176 MHz, DMSO-*d*<sub>6</sub>) δ 158.3, 156.2, 153.9, 151.5, 144.8 (dd, *J* = 9.8, 233.3 Hz), 140.0 (dd, *J* = 14.7, 250.3 Hz), 138.9, 133.1 (d, *J* = 7.6 Hz), 132.4 (d, *J* = 12.0 Hz), 113.5, 110.6 (d, *J* = 21.2 Hz), 106.7, 66.0, 44.6, 38.6, 28.9. <sup>19</sup>F NMR (376 MHz, DMSO-*d*<sub>6</sub>) δ -150.5 (d, *J* = 21.3 Hz), -155.8 (d, *J* = 21.6 Hz). HRMS(ESI-TOF): calcd for C<sub>18</sub>H<sub>18</sub>F<sub>2</sub>N<sub>8</sub>O (M+H)<sup>+</sup> 401.1644, found 401.1658.

*N*-((4,5-difluoro-1*H*-benzo[d]imidazol-2-yl)methyl)-9-ethyl-2-morpholino-9*H*-purin-6-amine (**12**). Compound **12** was prepared using general procedure in 53% yield over two steps as a beige solid. <sup>1</sup>H NMR (700 MHz, DMSO-*d*<sub>6</sub>) δ 12.51 (s, 1H), 8.04 (s, 1H), 7.86 (s, 1H), 7.31 – 6.99 (m, 2H), 4.80 (s, 2H), 4.03 (q, *J* = 7.2 Hz, 2H), 3.49 (d, *J* = 21.5 Hz, 8H), 1.35 (t, *J* = 7.3 Hz, 3H). <sup>13</sup>C NMR (176 MHz, DMSO-*d*<sub>6</sub>) δ 158.2, 156.1, 154.0, 151.0, 144.9 (d, *J* = 229.0 Hz), 140.0 (d, *J* = 246.0 Hz), 138.0, 133.1, 132.4, 113.8, 110.6, 106.7, 65.9, 44.6, 38.6, 37.5, 15.2. <sup>19</sup>F NMR (376 MHz, DMSO-*d*<sub>6</sub>) δ -150.5 (d, *J* = 21.0 Hz), -155.8 (d, *J* = 21.4 Hz). HRMS(ESI-TOF): calcd for C<sub>19</sub>H<sub>20</sub>F<sub>2</sub>N<sub>8</sub>O (M+H)<sup>+</sup> 415.1801, found 415.1795.

*N*-((4,5-difluoro-1*H*-benzo[d]imidazol-2-yl)methyl)-9-(3-fluorophenyl)-2-morpholino-9*H*-purin-6-amine (SR-3029, **13**). Compound **13** was prepared using general procedure in 52% yield over two steps as a white solid. <sup>1</sup>H NMR (400 MHz, DMSO-*d*<sub>6</sub>) δ 12.56 (s, 1H), 8.41 (s, 1H), 8.29 (s, 1H), 7.90 (dt, *J* = 2.3, 10.7 Hz, 1H), 7.86 (dt, *J* = 1.3, 8.1 Hz, 1H), 7.60 (td, *J* = 6.6, 8.3 Hz, 1H), 7.33 – 7.06 (m, 3H), 4.83 (s, 2H), 3.50 (d, *J* = 14.8 Hz, 8H). <sup>13</sup>C NMR (176 MHz, DMSO-*d*<sub>6</sub>) δ 162.3 (d, *J* = 243.9 Hz), 158.6, 156.0, 154.3, 150.6, 144.9 (dd, *J* = 9.8, 233.4 Hz), 140.0 (dd, *J* = 14.4, 250.5 Hz), 137.2 (d, *J* = 10.6 Hz), 136.6, 133.1 (d, *J* = 7.6 Hz), 132.4 (d, *J* = 11.4 Hz), 131.2 (d, *J* = 9.0 Hz), 117.5, 114.2, 113.3 (d, *J* = 21.0 Hz), 110.7 (d, *J* = 21.3 Hz), 108.9 (d, *J* = 25.8 Hz), 106.8 (d, *J* = 5.7 Hz), 65.9, 44.5, 38.6. <sup>19</sup>F NMR (376 MHz, DMSO-*d*<sub>6</sub>) δ -111.0, -150.4 (d, *J* = 21.3 Hz), -155.8 (d, *J* = 21.5 Hz). HRMS(ESI-TOF): calcd for C<sub>23</sub>H<sub>19</sub>F<sub>3</sub>N<sub>8</sub>O (M+H)<sup>+</sup> 481.1707, found 481.1714.

*N*-((4,5-difluoro-1*H*-benzo[d]imidazol-2-yl)methyl)-9-(4-fluorophenyl)-2-morpholino-9*H*-purin-6-amine (**14**). Compound **14** was prepared using general procedure in 28% yield over two steps as a white solid. <sup>1</sup>H NMR (400 MHz, DMSO-*d*<sub>6</sub>) δ 12.55 (s, 1H), 8.46 – 8.23 (m, 2H), 8.09 – 7.75 (m, 2H), 7.41 (dd, *J* = 7.8, 9.8 Hz, 2H), 7.29 – 7.10 (m, 2H), 4.83 (s, 2H), 3.49 (d, *J* = 12.7 Hz, 8H). <sup>19</sup>F NMR (376 MHz, DMSO-*d*<sub>6</sub>) δ -115.3, -150.5 (d, *J* = 21.4 Hz), -155.8 (d, *J* = 21.3 Hz). HRMS(ESI-TOF): calcd for C<sub>23</sub>H<sub>19</sub>F<sub>3</sub>N<sub>8</sub>O (M+H)<sup>+</sup> 481.1707, found 481.1717.

*N*-((4,5-difluoro-1*H*-benzo[d]imidazol-2-yl)methyl)-9-(3,4-difluorophenyl)-2-morpholino-9*H*-purin-6-amine (**15**). Compound **15** was prepared using general procedure in 16% yield over two steps as a white solid. <sup>1</sup>H NMR (700 MHz, DMSO-*d*<sub>6</sub>) δ 12.55 (s, 1H), 8.37 (s, 1H), 8.29 (s, 1H), 8.11 (ddd, *J* = 2.5, 7.1, 12.1 Hz, 1H), 7.85 (d, *J* = 8.9 Hz, 1H),

7.72 – 7.58 (m, 1H), 7.26 – 7.11 (m, 2H), 4.82 (s, 2H), 3.50 (d,  $J = 28.3$  Hz, 8H).  $^{13}\text{C}$  NMR (176 MHz, DMSO- $d_6$ )  $\delta$  158.6, 155.9, 154.3, 150.5, 149.3 (dd,  $J = 13.3, 245.7$  Hz), 147.8 (dd,  $J = 12.8, 245.6$  Hz), 144.8 (dd,  $J = 12.0, 231.8$  Hz), 140.0 (dd,  $J = 12.8, 250.6$  Hz), 136.6, 133.1, 132.4, 132.4, 118.6, 118.2 (d,  $J = 18.2$  Hz), 114.0, 111.5 (d,  $J = 20.7$  Hz), 110.6, 106.8, 65.9, 44.5, 38.6.  $^{19}\text{F}$  NMR (376 MHz, DMSO- $d_6$ )  $\delta$  -136.0 (d,  $J = 22.6$  Hz), -140.7 (d,  $J = 23.2$  Hz), -150.4 (d,  $J = 21.9$  Hz), -155.8. HRMS(ESI-TOF): calcd for  $\text{C}_{23}\text{H}_{18}\text{F}_4\text{N}_8\text{O}$  (M+H) $^+$  499.1613, found 499.1620.

*N*-((4,5-difluoro-1H-benzo[d]imidazol-2-yl)methyl)-9-(2,3-difluorophenyl)-2-morpholino-9H-purin-6-amine (16). Compound **16** was prepared using general procedure in 34% yield over two steps as a white solid.  $^1\text{H}$  NMR (400 MHz, DMSO- $d_6$ )  $\delta$  12.54 (s, 1H), 8.33 (s, 1H), 8.18 – 8.09 (m, 1H), 7.67 – 7.53 (m, 2H), 7.42 (tdd,  $J = 1.8, 5.5, 7.6$  Hz, 1H), 7.27 – 7.12 (m, 2H), 4.83 (s, 2H), 3.44 (s, 8H).  $^{19}\text{F}$  NMR (376 MHz, DMSO- $d_6$ )  $\delta$  -136.8 (d,  $J = 22.1$  Hz), -146.5 (d,  $J = 22.2$  Hz), -150.5 (d,  $J = 21.5$  Hz), -155.8 (d,  $J = 21.4$  Hz). HRMS(ESI-TOF): calcd for  $\text{C}_{23}\text{H}_{18}\text{F}_4\text{N}_8\text{O}$  (M+H) $^+$  499.1613, found 499.1618.

*N*-((4,5-difluoro-1H-benzo[d]imidazol-2-yl)methyl)-9-(3,5-difluorophenyl)-2-morpholino-9H-purin-6-amine (17). Compound **17** was prepared using general procedure in 15% yield over two steps as a white solid.  $^1\text{H}$  NMR (700 MHz, DMSO- $d_6$ )  $\delta$  12.56 (s, 1H), 8.48 (s, 1H), 8.33 (s, 1H), 7.90 (d,  $J = 8.3$  Hz, 2H), 7.31 – 7.23 (m, 1H), 7.22 – 7.06 (m, 2H), 4.83 (s, 2H), 3.51 (d,  $J = 26.4$  Hz, 8H).  $^{13}\text{C}$  NMR (176 MHz, DMSO- $d_6$ )  $\delta$  162.6 (dd,  $J = 15.1, 244.9$  Hz), 158.6, 155.9, 154.3, 150.6, 144.9 (dd,  $J = 8.3, 236.2$  Hz), 140.0 (dd,  $J = 14.7, 250.0$  Hz), 138.0, 136.4, 133.1 (d,  $J = 7.7$  Hz), 132.4 (d,  $J = 9.8$  Hz), 114.2, 110.7 (d,  $J = 20.0$  Hz), 106.8 (d,  $J = 9.2$  Hz), 105.1 – 104.5 (m), 101.8 (t,  $J = 26.2$  Hz), 65.8, 44.5, 38.7.  $^{19}\text{F}$  NMR (376 MHz, DMSO- $d_6$ )  $\delta$  -107.8, -150.4 (d,  $J = 23.6$  Hz), -155.8 (d,  $J = 19.9$  Hz). HRMS(ESI-TOF): calcd for  $\text{C}_{23}\text{H}_{18}\text{F}_4\text{N}_8\text{O}$  (M+H) $^+$  499.1613, found 499.1632.

*N*-((4,5-difluoro-1H-benzo[d]imidazol-2-yl)methyl)-9-(2,5-difluorophenyl)-2-morpholino-9H-purin-6-amine (18). Compound **18** was prepared using general procedure in 33% yield over two steps as a white solid.  $^1\text{H}$  NMR (400 MHz, DMSO- $d_6$ )  $\delta$  12.55 (s, 1H), 8.32 (s, 1H), 8.11 (s, 1H), 7.71 (ddd,  $J = 3.2, 5.9, 9.0$  Hz, 1H), 7.59 (td,  $J = 4.9, 9.6$  Hz, 1H), 7.41 (ddt,  $J = 3.4, 8.0, 9.3$  Hz, 1H), 7.27 – 7.10 (m, 1H), 4.82 (s, 2H), 3.45 (s, 8H).  $^{19}\text{F}$  NMR (376 MHz, DMSO- $d_6$ )  $\delta$  -116.8 (d,  $J = 17.0$  Hz), -127.2 (d,  $J = 16.7$  Hz), -150.4 (d,  $J = 21.3$  Hz), -155.8 (d,  $J = 21.6$  Hz). HRMS(ESI-TOF): calcd for  $\text{C}_{23}\text{H}_{18}\text{F}_4\text{N}_8\text{O}$  (M+H) $^+$  499.1613, found 499.1632.

*N*-((4,5-difluoro-1H-benzo[d]imidazol-2-yl)methyl)-9-(2,4-difluorophenyl)-2-morpholino-9H-purin-6-amine (19, TFA salt). Compound **19** was prepared using general procedure in 29% yield over two steps as a white solid (required reversed-phase HPLC for purification).  $^1\text{H}$  NMR (700 MHz, DMSO- $d_6$ )  $\delta$  8.31 (s, 1H), 8.07 (s, 1H), 7.76 (td,  $J = 5.9, 8.8$  Hz, 1H), 7.60 (ddd,  $J = 2.8, 9.2, 11.2$  Hz, 1H), 7.31 (td,  $J = 2.7, 8.7$  Hz, 1H), 7.26 (dd,  $J = 3.7, 8.9$  Hz, 1H), 7.20 (dt,  $J = 7.9, 11.4$  Hz, 1H), 5.10 – 4.51 (m, 2H), 3.42 (s, 8H).  $^{13}\text{C}$  NMR (176 MHz, DMSO- $d_6$ )  $\delta$  161.5 (dd,  $J = 11.4, 248.3$  Hz), 158.7, 156.2 (dd,  $J = 13.1, 252.3$  Hz), 156.0, 154.2, 151.5, 145.1 (dd,  $J = 9.7, 234.2$  Hz), 139.1 (d,  $J = 245.5$  Hz), 138.0, 133.9, 131.9, 129.6 (d,  $J = 10.3$  Hz), 119.3 (d,  $J = 12.2$  Hz), 113.0, 112.2 (dd,  $J = 3.6, 22.6$  Hz), 111.1 (d,  $J = 21.0$  Hz), 108.1, 105.3 (dd,  $J = 23.9, 27.2$  Hz),

65.8, 44.4, 38.5.  $^{19}\text{F}$  NMR (376 MHz,  $\text{DMSO-}d_6$ )  $\delta$  -74.3 (TFA), -109.0 (d,  $J = 7.3$  Hz), -117.5 (d,  $J = 5.4$  Hz), -149.9, -155.6 (d,  $J = 22.0$  Hz). HRMS(ESI-TOF): calcd for  $\text{C}_{23}\text{H}_{18}\text{F}_4\text{N}_8\text{O}$  ( $\text{M}+\text{H}$ ) $^+$  499.1613, found 499.1632.

*N-((4,5-difluoro-1H-benzo[d]imidazol-2-yl)methyl)-2-morpholino-9-(o-tolyl)-9H-purin-6-amine (20)*. Compound **20** was prepared using general procedure in 56% yield over two steps as a white solid.  $^1\text{H}$  NMR (700 MHz,  $\text{DMSO-}d_6$ )  $\delta$  12.56 (s, 1H), 8.24 (s, 1H), 7.95 (s, 1H), 7.47 – 7.39 (m, 2H), 7.36 (t,  $J = 7.5$  Hz, 1H), 7.32 (d,  $J = 7.7$  Hz, 1H), 7.25 – 7.13 (m, 2H), 4.84 (s, 2H), 3.41 (s, 8H), 2.13 (s, 3H).  $^{13}\text{C}$  NMR (176 MHz,  $\text{DMSO-}d_6$ )  $\delta$  158.6, 156.1, 154.2, 151.6, 144.9 (d,  $J = 234.4$  Hz), 140.0 (d,  $J = 248.2$  Hz), 138.3, 134.7, 134.0, 133.1 (d,  $J = 7.0$  Hz), 132.5, 131.0, 128.8, 127.5, 126.8, 113.3, 110.7 (d,  $J = 21.0$  Hz), 106.8, 65.8, 44.5, 38.7, 17.9.  $^{19}\text{F}$  NMR (376 MHz,  $\text{DMSO-}d_6$ )  $\delta$  -150.4 (d,  $J = 21.3$  Hz), -155.8 (d,  $J = 21.6$  Hz). HRMS(ESI-TOF): calcd for  $\text{C}_{24}\text{H}_{22}\text{F}_2\text{N}_8\text{O}$  ( $\text{M}+\text{H}$ ) $^+$  477.1957, found 477.1965.

*N-((4,5-difluoro-1H-benzo[d]imidazol-2-yl)methyl)-2-morpholino-9-(2-(trifluoromethyl)phenyl)-9H-purin-6-amine (21)*. Compound **21** was prepared using general procedure in 55% yield over two steps as a white solid.  $^1\text{H}$  NMR (700 MHz,  $\text{DMSO-}d_6$ )  $\delta$  12.58 (s, 1H), 8.26 (s, 1H), 8.02 – 7.94 (m, 2H), 7.88 (td,  $J = 1.4, 7.7$  Hz, 1H), 7.78 (t,  $J = 7.8$  Hz, 1H), 7.59 (d,  $J = 7.9$  Hz, 1H), 7.22 (dd,  $J = 3.7, 8.8$  Hz, 1H), 7.17 (ddd,  $J = 7.1, 8.7, 11.4$  Hz, 1H), 4.83 (s, 2H), 3.47 – 3.35 (m, 8H).  $^{13}\text{C}$  NMR (176 MHz,  $\text{DMSO-}d_6$ )  $\delta$  158.7, 156.1, 154.1, 153.0, 144.9 (dd,  $J = 9.6, 233.5$  Hz), 140.0 (dd,  $J = 14.6, 250.3$  Hz), 138.5, 138.4, 133.8, 133.1 (d,  $J = 7.5$  Hz), 132.4, 131.2, 130.1, 127.3 (d,  $J = 5.1$  Hz), 126.5 (q,  $J = 30.3$  Hz), 123.0 (q,  $J = 273.8$  Hz), 112.6, 110.7 (d,  $J = 21.0$  Hz), 106.8, 65.8, 44.4, 38.7.  $^{19}\text{F}$  NMR (376 MHz,  $\text{DMSO-}d_6$ )  $\delta$  -58.4, -150.4 (d,  $J = 21.4$  Hz), -155.8 (d,  $J = 21.3$  Hz). HRMS(ESI-TOF): calcd for  $\text{C}_{24}\text{H}_{19}\text{F}_5\text{N}_8\text{O}$  ( $\text{M}+\text{H}$ ) $^+$  531.1675, found 531.1690.

*N-((4,5-difluoro-1H-benzo[d]imidazol-2-yl)methyl)-2-(4-methylpiperazin-1-yl)-9-(thiophen-3-yl)-9H-purin-6-amine (22)*. Compound **22** was prepared using general procedure in 43% yield over two steps as a white solid.  $^1\text{H}$  NMR (700 MHz,  $\text{DMSO-}d_6$ )  $\delta$  12.64 (s, 1H), 8.41 (s, 1H), 8.28 (s, 1H), 8.10 (d,  $J = 3.2$  Hz, 1H), 7.79 (d,  $J = 5.3$  Hz, 1H), 7.74 (dd,  $J = 3.2, 5.2$  Hz, 1H), 7.26 – 7.09 (m, 2H), 4.82 (s, 2H), 3.67 (s, 4H), 2.49 – 2.23 (m, 7H).  $^{13}\text{C}$  NMR (176 MHz,  $\text{DMSO-}d_6$ )  $\delta$  158.9, 156.4, 154.7, 150.6, 145.3 (dd,  $J = 9.8, 232.7$  Hz), 140.4 (dd,  $J = 14.7, 250.6$  Hz), 137.0, 134.2, 133.5 (d,  $J = 7.5$  Hz), 132.9 (d,  $J = 12.4$  Hz), 127.4, 121.6, 114.2, 113.5, 111.1 (d,  $J = 20.9$  Hz), 107.2, 53.9, 45.0, 43.4, 39.1.  $^{19}\text{F}$  NMR (376 MHz,  $\text{DMSO-}d_6$ )  $\delta$  -150.5 (d,  $J = 21.5$  Hz), -155.8 (d,  $J = 21.3$  Hz). HRMS(ESI-TOF): calcd for  $\text{C}_{22}\text{H}_{21}\text{F}_2\text{N}_9\text{S}$  ( $\text{M}+\text{H}$ ) $^+$  482.1681, found 482.1694.

*N-((4,5-difluoro-1H-benzo[d]imidazol-2-yl)methyl)-2-morpholino-9-(thiophen-3-yl)-9H-purin-6-amine (23)*. Compound **23** was prepared using general procedure in 42% yield over two steps as a white solid.  $^1\text{H}$  NMR (700 MHz,  $\text{DMSO-}d_6$ )  $\delta$  12.56 (s, 1H), 8.41 (s, 1H), 8.25 (s, 1H), 8.10 (dd,  $J = 1.4, 3.3$  Hz, 1H), 7.80 (d,  $J = 5.2$  Hz, 1H), 7.74 (dd,  $J = 3.2, 5.2$  Hz, 1H), 7.23 – 7.11 (m, 2H), 4.83 (s, 2H), 3.52 (d,  $J = 39.1$  Hz, 8H).  $^{13}\text{C}$  NMR (176 MHz,  $\text{DMSO-}d_6$ )  $\delta$  158.7, 156.0, 154.2, 150.2, 144.8 (dd,  $J = 9.8, 232.9$  Hz), 140.0 (dd,  $J = 14.3, 250.5$  Hz), 136.4, 133.8, 133.1 (d,  $J = 7.8$  Hz), 132.4 (d,  $J = 12.4$  Hz), 126.9, 121.2, 113.8, 113.0, 110.7 (d,  $J = 21.2$  Hz), 106.7, 65.9, 44.6, 38.7.  $^{19}\text{F}$  NMR

(376 MHz, DMSO- $d_6$ )  $\delta$  -150.4 (d,  $J$  = 21.6 Hz), -155.8 (d,  $J$  = 21.5 Hz). HRMS(ESI-TOF): calcd for C<sub>21</sub>H<sub>18</sub>F<sub>2</sub>N<sub>8</sub>OS (M+H)<sup>+</sup> 469.1365, found 469.1367.

*N*-((4,5-difluoro-1H-benzo[d]imidazol-2-yl)methyl)-2-(4-methylpiperazin-1-yl)-9-(pyridin-3-yl)-9H-purin-6-amine (**24**). Compound **24** was prepared using general procedure in 68% yield over two steps as a beige solid. <sup>1</sup>H NMR (700 MHz, DMSO- $d_6$ )  $\delta$  12.59 (s, 1H), 9.15 (s, 1H), 8.58 (d,  $J$  = 4.8 Hz, 1H), 8.39 (s, 1H), 8.33 (dt,  $J$  = 1.7, 8.4 Hz, 1H), 8.28 (s, 1H), 7.61 (dd,  $J$  = 4.7, 8.3 Hz, 1H), 7.16 (tt,  $J$  = 8.6, 15.9 Hz, 2H), 4.83 (s, 2H), 3.54 (s, 4H), 2.17 (s, 4H), 2.11 (s, 3H). <sup>13</sup>C NMR (176 MHz, DMSO- $d_6$ )  $\delta$  159.0, 156.4, 154.7, 151.2, 148.0, 145.3 (d,  $J$  = 232.8 Hz), 143.5, 140.4 (d,  $J$  = 253.1 Hz), 136.8, 133.5, 132.9, 129.9, 124.7, 114.2, 111.1 (d,  $J$  = 20.6 Hz), 107.2, 54.6, 46.1, 44.2, 39.1. <sup>19</sup>F NMR (376 MHz, DMSO- $d_6$ )  $\delta$  -150.5 (d,  $J$  = 21.4 Hz), -155.8 (d,  $J$  = 21.5 Hz). HRMS(ESI-TOF): calcd for C<sub>23</sub>H<sub>22</sub>F<sub>2</sub>N<sub>10</sub> (M+H)<sup>+</sup> 477.2070, found 477.2078

*N*-((6,7-difluoro-1H-benzo[d]imidazol-2-yl)methyl)-2-morpholino-9-(pyridin-3-yl)-9H-purin-6-amine (**25**). Compound **25** was prepared using general procedure in 81% yield over two steps as a white solid. <sup>1</sup>H NMR (400 MHz, DMSO- $d_6$ )  $\delta$  12.56 (s, 1H), 9.15 (d,  $J$  = 2.6 Hz, 1H), 8.59 (dd,  $J$  = 1.5, 4.7 Hz, 1H), 8.42 (s, 1H), 8.35 (ddd,  $J$  = 1.5, 2.7, 8.3 Hz, 2H), 7.61 (ddd,  $J$  = 0.8, 4.7, 8.3 Hz, 1H), 7.28 – 7.10 (m, 2H), 4.83 (s, 2H), 3.49 (d,  $J$  = 16.0 Hz, 8H). <sup>13</sup>C NMR (176 MHz, DMSO- $d_6$ )  $\delta$  158.6, 156.0, 154.2, 150.7, 147.0, 145.3 (dd,  $J$  = 9.5, 235.3 Hz), 142.4, 138.8 (dd,  $J$  = 15.3, 251.0 Hz), 136.5, 133.4, 132.6, 130.1, 128.7, 124.6, 113.8, 111.7 (d,  $J$  = 21.1 Hz), 108.4, 65.9, 44.5, 38.3. <sup>19</sup>F NMR (376 MHz, DMSO- $d_6$ )  $\delta$  -150.4 (d,  $J$  = 21.6 Hz), -155.8 (d,  $J$  = 21.1 Hz). HRMS(ESI-TOF): calcd for C<sub>22</sub>H<sub>19</sub>F<sub>2</sub>N<sub>9</sub>O (M+H)<sup>+</sup> 464.1753, found 464.1764.

*N*-((4,5-difluoro-1H-benzo[d]imidazol-2-yl)methyl)-2-(4-methylpiperazin-1-yl)-9-(pyridin-2-yl)-9H-purin-6-amine (**26**). Compound **26** was prepared using general procedure in 67% yield over two steps as a beige solid. <sup>1</sup>H NMR (400 MHz, DMSO- $d_6$ )  $\delta$  12.57 (s, 1H), 8.61 (s, 1H), 8.56 – 8.47 (m, 2H), 8.29 (s, 1H), 8.14 – 7.88 (m, 1H), 7.40 (ddd,  $J$  = 1.1, 4.7, 7.5 Hz, 1H), 7.22 – 7.10 (m, 2H), 4.82 (s, 2H), 3.59 (s, 4H), 2.19 (s, 4H), 2.12 (s, 3H). <sup>19</sup>F NMR (376 MHz, DMSO- $d_6$ )  $\delta$  -150.5 (d,  $J$  = 21.5 Hz), -155.8 (d,  $J$  = 21.4 Hz). HRMS(ESI-TOF): calcd for C<sub>23</sub>H<sub>22</sub>F<sub>2</sub>N<sub>10</sub> (M+H)<sup>+</sup> 477.2070, found 477.2082.

*N*-((4,5-difluoro-1H-benzo[d]imidazol-2-yl)methyl)-2-morpholino-9-(pyridin-2-yl)-9H-purin-6-amine (**27**). Compound **27** was prepared using general procedure in 67% yield over two steps as a beige solid. <sup>1</sup>H NMR (400 MHz, DMSO- $d_6$ )  $\delta$  12.57 (s, 1H), 8.63 (s, 1H), 8.57 – 8.51 (m, 2H), 8.33 (s, 1H), 8.11 – 8.02 (m, 1H), 7.40 (ddd,  $J$  = 0.9, 4.9, 7.5 Hz, 1H), 7.25 – 7.07 (m, 2H), 4.84 (s, 2H), 3.54 (d,  $J$  = 24.4 Hz, 8H). <sup>19</sup>F NMR (376 MHz, DMSO- $d_6$ )  $\delta$  -150.4 (d,  $J$  = 21.3 Hz), -155.8 (d,  $J$  = 21.4 Hz). HRMS(ESI-TOF): calcd for C<sub>22</sub>H<sub>19</sub>F<sub>2</sub>N<sub>9</sub>O (M+H)<sup>+</sup> 464.1753, found 464.1775.

*N*-((4,5-difluoro-1H-benzo[d]imidazol-2-yl)methyl)-2-(4-methylpiperazin-1-yl)-9-(pyridin-4-yl)-9H-purin-6-amine (**28**). Compound **28** was prepared using general procedure in 21% yield over two steps as a white solid. <sup>1</sup>H NMR (400 MHz, DMSO- $d_6$ )  $\delta$  12.57 (s, 1H), 8.76 – 8.67 (m, 2H), 8.58 (s, 1H), 8.32 (s, 1H), 8.20 – 8.12 (m, 2H), 7.30 – 7.08 (m, 2H), 4.82 (s, 2H), 3.58 (s, 4H), 2.16 (s, 4H), 2.11 (s, 3H). <sup>13</sup>C NMR (176 MHz, DMSO- $d_6$ )  $\delta$  158.6, 155.9, 154.3, 151.1, 150.9, 144.9 (dd,  $J$  = 9.7, 233.2 Hz), 142.6,

140.0 (dd,  $J = 14.4, 250.8$  Hz), 135.7, 133.1 (d,  $J = 7.3$  Hz), 132.4 (d,  $J = 12.0$  Hz), 114.7, 114.2, 110.6 (d,  $J = 21.3$  Hz), 106.7, 54.3, 45.8, 43.9, 38.7.  $^{19}\text{F}$  NMR (376 MHz,  $\text{DMSO-}d_6$ )  $\delta$  -150.5 (d,  $J = 20.9$  Hz), -155.8 (d,  $J = 21.7$  Hz). HRMS(ESI-TOF): calcd for  $\text{C}_{23}\text{H}_{22}\text{F}_2\text{N}_{10}$  (M+H) $^+$  477.2070, found 477.2078.

*N-((4,5-difluoro-1H-benzo[d]imidazol-2-yl)methyl)-2-morpholino-9-(pyridin-4-yl)-9H-purin-6-amine (29)*. Compound **29** was prepared using general procedure in 53% yield over two steps as a white solid.  $^1\text{H}$  NMR (400 MHz,  $\text{DMSO-}d_6$ )  $\delta$  12.56 (s, 1H), 8.76 – 8.69 (m, 2H), 8.60 (s, 1H), 8.36 (s, 1H), 8.20 – 8.13 (m, 2H), 7.27 – 7.10 (m, 2H), 4.83 (s, 2H), 3.53 (d,  $J = 23.6$  Hz, 8H).  $^{13}\text{C}$  NMR (176 MHz,  $\text{DMSO-}d_6$ )  $\delta$  158.7, 155.9, 154.3, 151.1, 150.8, 144.9 (d,  $J = 235.5$  Hz), 142.6, 139.9 (d,  $J = 260.8$  Hz), 135.9, 133.1, 132.4, 114.7, 114.4, 110.7, 106.8, 65.9, 44.5, 38.6.  $^{19}\text{F}$  NMR (376 MHz,  $\text{DMSO-}d_6$ )  $\delta$  -150.4 (d,  $J = 21.5$  Hz), -155.8 (d,  $J = 21.6$  Hz). HRMS(ESI-TOF): calcd for  $\text{C}_{22}\text{H}_{19}\text{F}_2\text{N}_9\text{O}$  (M+H) $^+$  464.1753, found 464.1753.

*N-((4,5-difluoro-1H-benzo[d]imidazol-2-yl)methyl)-9-(2-fluoropyridin-4-yl)-2-(4-methylpiperazin-1-yl)-9H-purin-6-amine (30)*. Compound **30** was prepared using general procedure in 46% yield over two steps as a white solid.  $^1\text{H}$  NMR (700 MHz,  $\text{DMSO-}d_6$ )  $\delta$  12.60 (s, 1H), 8.62 (s, 1H), 8.38 (d,  $J = 5.7$  Hz, 1H), 8.33 (s, 1H), 8.21 (d,  $J = 5.7$  Hz, 1H), 7.98 (s, 1H), 7.24 – 7.06 (m, 2H), 4.98 – 4.68 (m, 2H), 3.57 (s, 4H), 2.17 (s, 4H), 2.10 (s, 3H).  $^{13}\text{C}$  NMR (176 MHz,  $\text{DMSO-}d_6$ )  $\delta$  163.9 (d,  $J = 232.7$  Hz), 158.6, 155.8, 154.3, 150.9, 149.0 (d,  $J = 17.2$  Hz), 147.0 (d,  $J = 11.1$  Hz), 144.9 (d,  $J = 237.2$  Hz), 140.0 (d,  $J = 258.1$  Hz), 135.7, 133.1, 132.4, 114.1, 112.9, 110.6 (d,  $J = 21.2$  Hz), 106.7, 99.8 (d,  $J = 43.7$  Hz), 54.2, 45.7, 43.8, 38.7.  $^{19}\text{F}$  NMR (376 MHz,  $\text{DMSO-}d_6$ )  $\delta$  -66.2, -150.5 (d,  $J = 21.0$  Hz), -155.8 (d,  $J = 21.5$  Hz). HRMS(ESI-TOF): calcd for  $\text{C}_{23}\text{H}_{21}\text{F}_3\text{N}_{10}$  (M+H) $^+$  495.1976, found 495.1971.

*N-((4,5-difluoro-1H-benzo[d]imidazol-2-yl)methyl)-9-(2-fluoropyridin-4-yl)-2-morpholino-9H-purin-6-amine (31)*. Compound **31** was prepared using general procedure in 46% yield over two steps as a white solid.  $^1\text{H}$  NMR (400 MHz,  $\text{DMSO-}d_6$ )  $\delta$  12.58 (s, 1H), 8.66 (s, 1H), 8.39 (d,  $J = 5.7$  Hz, 2H), 8.24 (d,  $J = 5.6$  Hz, 1H), 8.00 (d,  $J = 1.8$  Hz, 1H), 7.32 – 7.05 (m, 2H), 4.83 (s, 2H), 3.53 (d,  $J = 22.0$  Hz, 8H).  $^{19}\text{F}$  NMR (376 MHz,  $\text{DMSO-}d_6$ )  $\delta$  -66.2, -150.4, -155.7. HRMS(ESI-TOF): calcd for  $\text{C}_{22}\text{H}_{18}\text{F}_3\text{N}_9\text{O}$  (M+H) $^+$  482.1659, found 482.1664.

*9-(6-chloropyridin-3-yl)-N-((4,5-difluoro-1H-benzo[d]imidazol-2-yl)methyl)-2-(4-methylpiperazin-1-yl)-9H-purin-6-amine (32)*. Compound **32** was prepared using general procedure in 27% yield over two steps as a white solid (required reversed-phase HPLC for purification).  $^1\text{H}$  NMR (400 MHz,  $\text{DMSO-}d_6$ )  $\delta$  12.55 (s, 1H), 9.04 (d,  $J = 2.8$  Hz, 1H), 8.50 – 8.38 (m, 2H), 8.30 (s, 1H), 7.76 (d,  $J = 8.7$  Hz, 1H), 7.24 – 7.11 (m, 2H), 4.81 (s, 2H), 3.53 (s, 4H), 2.13 (s, 4H), 2.09 (s, 3H). HRMS(ESI-TOF): calcd for  $\text{C}_{23}\text{H}_{21}\text{ClF}_2\text{N}_{10}$  (M+H) $^+$  511.1680, found 511.1688.

*9-(6-chloropyridin-3-yl)-N-((4,5-difluoro-1H-benzo[d]imidazol-2-yl)methyl)-2-morpholino-9H-purin-6-amine (33)*. Compound **33** was prepared using general procedure in 41% yield over two steps as a white solid (required reversed-phase HPLC for purification).  $^1\text{H}$  NMR (400 MHz,  $\text{DMSO-}d_6$ )  $\delta$  12.56 (s, 1H), 9.04 (d,  $J = 2.8$  Hz, 1H),

8.53 – 8.42 (m, 2H), 8.36 (s, 1H), 7.75 (dd,  $J = 0.6, 8.7$  Hz, 1H), 7.27 – 7.08 (m, 2H), 4.82 (s, 2H), 3.50 (d,  $J = 17.8$  Hz, 8H). HRMS(ESI-TOF): calcd for  $C_{22}H_{18}ClF_2N_9O$  ( $M+H$ )<sup>+</sup> 498.1364, found 498.1355.

*N-((4,5-difluoro-1H-benzo[d]imidazol-2-yl)methyl)-2-(4-methylpiperazin-1-yl)-9-(2-methylpyridin-4-yl)-9H-purin-6-amine (34)*. Compound **34** was prepared using general procedure in 51% yield over two steps as a white solid (required reversed-phase HPLC for purification). <sup>1</sup>H NMR (400 MHz, DMSO-*d*<sub>6</sub>) δ 12.57 (s, 1H), 8.60 – 8.50 (m, 2H), 8.30 (s, 1H), 8.00 (dd,  $J = 3.4, 8.9$  Hz, 2H), 7.28 – 7.09 (m, 2H), 4.81 (s, 2H), 3.56 (s, 5H), 2.54 (s, 3H), 2.15 (s, 4H), 2.09 (s, 3H). HRMS(ESI-TOF): calcd for  $C_{24}H_{24}F_2N_{10}$  ( $M+H$ )<sup>+</sup> 491.2226, found 491.2245.

*N-((4,5-difluoro-1H-benzo[d]imidazol-2-yl)methyl)-9-(2-methylpyridin-4-yl)-2-morpholino-9H-purin-6-amine (35)*. Compound **35** was prepared using general procedure in 52% yield over two steps as a white solid (required reversed-phase HPLC for purification). <sup>1</sup>H NMR (400 MHz, DMSO-*d*<sub>6</sub>) δ 12.59 (s, 1H), 8.61 – 8.49 (m, 2H), 8.33 (s, 1H), 8.06 – 7.88 (m, 2H), 7.27 – 7.09 (m, 2H), 4.83 (s, 2H), 3.52 (d,  $J = 20.7$  Hz, 8H), 2.54 (s, 3H). HRMS(ESI-TOF): calcd for  $C_{23}H_{21}F_2N_9O$  ( $M+H$ )<sup>+</sup> 478.1910, found 478.1912.

*N-((1H-benzo[d]imidazol-2-yl)methyl)-2-(4-methylpiperazin-1-yl)-9-(pyridin-3-yl)-9H-purin-6-amine (36)*. Compound **36** was prepared using general procedure in 67% yield over two steps as a white solid. <sup>1</sup>H NMR (400 MHz, DMSO-*d*<sub>6</sub>) δ 12.18 (s, 1H), 9.16 (d,  $J = 2.6$  Hz, 1H), 8.58 (dd,  $J = 1.5, 4.7$  Hz, 1H), 8.39 (s, 1H), 8.34 (dt,  $J = 1.9, 8.5$  Hz, 1H), 8.19 (s, 1H), 7.61 (dd,  $J = 4.7, 8.3$  Hz, 1H), 7.46 (d,  $J = 30.9$  Hz, 2H), 7.11 (dt,  $J = 3.6, 6.0$  Hz, 2H), 4.86 (s, 2H), 3.57 (s, 4H), 2.17 (s, 4H), 2.10 (s, 3H). <sup>13</sup>C NMR (101 MHz, DMSO-*d*<sub>6</sub>) δ 158.7, 154.4, 153.3, 150.7, 147.6, 143.0, 136.2, 134.3, 132.5, 129.4, 124.2, 121.4, 121.0, 118.2, 113.8, 111.1, 54.3, 45.8, 43.8, 38.7. HRMS(ESI-TOF): calcd for  $C_{23}H_{24}N_{10}$  ( $M+H$ )<sup>+</sup> 441.2258, found 441.2265.

*N-((1H-benzo[d]imidazol-2-yl)methyl)-2-morpholino-9-(pyridin-3-yl)-9H-purin-6-amine (37)*. Compound **37** was prepared using general procedure in 76% yield over two steps as a white solid. <sup>1</sup>H NMR (700 MHz, DMSO-*d*<sub>6</sub>) δ 12.18 (s, 1H), 9.16 (d,  $J = 2.7$  Hz, 1H), 8.58 (dd,  $J = 1.4, 4.7$  Hz, 1H), 8.41 (s, 1H), 8.35 (dt,  $J = 1.9, 8.5$  Hz, 1H), 8.23 (s, 1H), 7.60 (dd,  $J = 4.7, 8.3$  Hz, 1H), 7.46 (s, 2H), 7.12 – 7.06 (m, 2H), 4.86 (s, 2H), 3.51 (d,  $J = 40.3$  Hz, 8H). <sup>13</sup>C NMR (176 MHz, DMSO-*d*<sub>6</sub>) δ 158.8, 154.4, 153.2, 150.6, 147.6, 143.0, 136.3, 132.5, 129.4, 124.2, 121.2, 114.0, 65.9, 44.5, 38.6. HRMS(ESI-TOF): calcd for  $C_{22}H_{21}N_9O$  ( $M+H$ )<sup>+</sup> 428.1942, found 428.1961.

*N-((1H-benzo[d]imidazol-2-yl)methyl)-2-(piperazin-1-yl)-9-(pyridin-3-yl)-9H-purin-6-amine (38, TFA salt)*. Compound **38** was prepared using general procedure in 78% yield over three steps (including Boc deprotection) as a yellow solid. <sup>1</sup>H NMR (700 MHz, DMSO-*d*<sub>6</sub>) δ 9.29 (s, 1H), 9.14 (s, 1H), 8.83 (s, 1H), 8.71 (s, 1H), 8.62 (d,  $J = 4.7$  Hz, 1H), 8.50 (s, 1H), 8.33 (d,  $J = 8.3$  Hz, 1H), 7.75 (dt,  $J = 3.4, 6.1$  Hz, 2H), 7.62 (dd,  $J = 4.7, 8.3$  Hz, 1H), 7.49 (dt,  $J = 3.0, 6.1$  Hz, 2H), 5.07 (d,  $J = 5.4$  Hz, 2H), 3.67 (s, 4H), 2.92 (s, 4H). <sup>13</sup>C NMR (176 MHz, DMSO-*d*<sub>6</sub>) δ 157.8, 154.1, 153.4, 150.8, 147.9, 143.2,



137.5, 132.2, 131.6, 131.4, 129.9, 125.3, 124.3, 113.9, 42.2, 40.8, 37.2. HRMS(ESI-TOF): calcd for C<sub>22</sub>H<sub>22</sub>N<sub>10</sub> (M+H)<sup>+</sup> 427.2102, found 427.2095.

*N*-((5-chloro-1*H*-benzo[d]imidazol-2-yl)methyl)-2-(4-methylpiperazin-1-yl)-9-(pyridin-3-yl)-9*H*-purin-6-amine (**39**). Compound **39** was prepared using general procedure in 52% yield over two steps as a white solid. <sup>1</sup>H NMR (700 MHz, DMSO-*d*<sub>6</sub>) δ 12.35 (s, 0.6H), 12.28 (s, 0.4H), 9.15 (d, *J* = 2.5 Hz, 1H), 8.59 (d, *J* = 4.7 Hz, 1H), 8.39 (s, 1H), 8.34 (d, *J* = 8.3 Hz, 1H), 8.22 (s, 1H), 7.61 (dd, *J* = 4.7, 8.3 Hz, 1H), 7.58 – 7.51 (m, 1H), 7.46 – 7.38 (m, 1H), 7.13 (dd, *J* = 8.7, 11.6 Hz, 1H), 4.82 (s, 2H), 3.54 (s, 4H), 2.15 (s, 4H), 2.10 (s, 3H). <sup>13</sup>C NMR (176 MHz, DMSO-*d*<sub>6</sub>) δ 158.7, 155.2, 154.7, 154.3, 150.7, 147.6, 144.2, 143.0, 142.0, 136.3, 135.1, 133.1, 132.5, 129.4, 125.8, 125.3, 124.2, 121.5, 121.2, 119.4, 117.6, 113.8, 112.3, 110.9, 54.3, 45.8, 43.8, 38.7 (as a mixture of 5-chloro and 6-chlorobenzimidazole tautomers, 0.6:0.4). HRMS(ESI-TOF): calcd for C<sub>23</sub>H<sub>23</sub>ClN<sub>10</sub> (M+H)<sup>+</sup> 475.1868, found 475.1867.

*N*-((5-chloro-1*H*-benzo[d]imidazol-2-yl)methyl)-2-morpholino-9-(pyridin-3-yl)-9*H*-purin-6-amine (**40**). Compound **40** was prepared using general procedure in 53% yield over two steps as a white solid. <sup>1</sup>H NMR (400 MHz, DMSO-*d*<sub>6</sub>) δ 12.35 (s, 0.6H), 12.29 (s, 0.4H), 9.15 (d, *J* = 2.6 Hz, 1H), 8.59 (dd, *J* = 1.5, 4.7 Hz, 1H), 8.41 (s, 1H), 8.35 (ddd, *J* = 1.5, 2.6, 8.3 Hz, 1H), 8.28 (s, 1H), 7.61 (ddd, *J* = 0.8, 4.7, 8.4 Hz, 1H), 7.59 – 7.51 (m, 1H), 7.47 – 7.39 (m, 1H), 7.14 (t, *J* = 7.2 Hz, 1H), 4.83 (s, 2H), 3.50 (d, *J* = 15.8 Hz, 8H). HRMS(ESI-TOF): calcd for C<sub>22</sub>H<sub>20</sub>ClN<sub>9</sub>O (M+H)<sup>+</sup> 462.1552, found 462.1544.

*N*-((5-chloro-1*H*-benzo[d]imidazol-2-yl)methyl)-2-(piperazin-1-yl)-9-(pyridin-3-yl)-9*H*-purin-6-amine (**41**, TFA salt). Compound **41** was prepared using general procedure in 61% yield over two steps as a white solid. <sup>1</sup>H NMR (700 MHz, DMSO-*d*<sub>6</sub>) δ 9.37 (s, 1H), 9.14 (d, *J* = 2.6 Hz, 1H), 8.87 (s, 1H), 8.65 – 8.58 (m, 2H), 8.48 (s, 1H), 8.34 (d, *J* = 8.2 Hz, 2H), 7.75 – 7.71 (m, 1H), 7.68 – 7.60 (m, 2H), 7.37 (d, *J* = 8.5 Hz, 1H), 4.99 – 4.94 (m, 2H), 3.71 (s, 4H), 2.94 (s, 4H). <sup>13</sup>C NMR (176 MHz, DMSO-*d*<sub>6</sub>) δ 157.8, 154.9, 154.2, 150.7, 147.8, 143.1, 137.3, 135.5, 133.1, 132.3, 129.9, 128.0, 124.4, 124.0, 115.6, 114.3, 114.1, 42.2, 40.9, 37.9. HRMS(ESI-TOF): calcd for C<sub>22</sub>H<sub>21</sub>ClN<sub>10</sub> (M+H)<sup>+</sup> 461.1712, found 461.1702.

*N*-((5,6-dichloro-1*H*-benzo[d]imidazol-2-yl)methyl)-2-(4-methylpiperazin-1-yl)-9-(pyridin-3-yl)-9*H*-purin-6-amine (**42**). Compound **42** was prepared using general procedure in 40% yield over two steps as a beige solid. <sup>1</sup>H NMR (700 MHz, DMSO-*d*<sub>6</sub>) δ 12.47 (s, 1H), 9.15 (s, 1H), 8.59 (d, *J* = 4.8 Hz, 1H), 8.39 (s, 1H), 8.33 (d, *J* = 8.3 Hz, 1H), 8.26 (s, 1H), 7.79 (s, 1H), 7.66 – 7.59 (m, 2H), 4.82 (s, 2H), 3.62 – 3.45 (m, 4H), 2.17 (s, 4H), 2.12 (s, 3H). <sup>13</sup>C NMR (176 MHz, DMSO-*d*<sub>6</sub>) δ 158.6, 156.5, 154.3, 150.7, 147.6, 143.1, 143.0, 136.3, 133.9, 132.4, 129.4, 124.2, 123.8, 123.4, 119.4, 113.8, 112.5, 54.2, 45.6, 43.7, 38.7. HRMS(ESI-TOF): calcd for C<sub>23</sub>H<sub>22</sub>Cl<sub>2</sub>N<sub>10</sub> (M+H)<sup>+</sup> 509.1479, found 509.1461.

*N*-((5,6-dichloro-1*H*-benzo[d]imidazol-2-yl)methyl)-2-morpholino-9-(pyridin-3-yl)-9*H*-purin-6-amine (**43**). Compound **43** was prepared using general procedure in 51% yield over two steps as a white solid. <sup>1</sup>H NMR (400 MHz, DMSO-*d*<sub>6</sub>) δ 12.47 (s, 1H), 9.15 (d, *J* = 2.6 Hz, 1H), 8.59 (dd, *J* = 1.5, 4.7 Hz, 1H), 8.41 (s, 1H), 8.37 – 8.27 (m, 2H), 7.72

(d,  $J = 38.5$  Hz, 2H), 7.61 (ddd,  $J = 0.8, 4.8, 8.3$  Hz, 1H), 4.83 (s, 2H), 3.49 (d,  $J = 9.8$  Hz, 8H). HRMS(ESI-TOF): calcd for  $C_{22}H_{19}Cl_2N_9O$  (M+H)<sup>+</sup> 496.1162, found 496.1170.

*N-((5,6-dichloro-1H-benzo[d]imidazol-2-yl)methyl)-2-(piperazin-1-yl)-9-(pyridin-3-yl)-9H-purin-6-amine (44, TFA salt)*. Compound **44** was prepared using general procedure in 60% yield over three steps (including Boc deprotection) as a beige solid. <sup>1</sup>H NMR (400 MHz, DMSO-*d*<sub>6</sub>) δ 9.15 (d,  $J = 2.5$  Hz, 1H), 8.66 – 8.61 (m, 3H), 8.51 (s, 1H), 8.48 – 8.30 (m, 2H), 7.77 (s, 2H), 7.63 (ddd,  $J = 0.8, 4.7, 8.4$  Hz, 1H), 4.84 (d,  $J = 5.4$  Hz, 2H), 3.73 (s, 4H), 2.96 (s, 4H). <sup>13</sup>C NMR (176 MHz, DMSO-*d*<sub>6</sub>) δ 157.9, 156.4, 154.3, 150.6, 147.6, 143.0, 137.1, 136.6, 132.3, 130.0, 124.8, 124.4, 120.6, 115.9, 114.2, 42.3, 40.9, 38.5. HRMS(ESI-TOF): calcd for  $C_{22}H_{20}Cl_2N_{10}$  (M+H)<sup>+</sup> 495.1322, found 495.1318.

*N-((6-methoxy-1H-benzo[d]imidazol-2-yl)methyl)-2-(4-methylpiperazin-1-yl)-9-(pyridin-3-yl)-9H-purin-6-amine (45)*. Compound **45** was prepared using general procedure in 61% yield over two steps as a beige solid. <sup>1</sup>H NMR (700 MHz, DMSO-*d*<sub>6</sub>) δ 11.95 (s, 1H), 9.16 (d,  $J = 2.6$  Hz, 1H), 8.59 (dd,  $J = 1.4, 4.7$  Hz, 1H), 8.39 (s, 1H), 8.34 (dt,  $J = 1.9, 8.4$  Hz, 1H), 8.13 (s, 1H), 7.62 (dd,  $J = 4.7, 8.3$  Hz, 1H), 7.34 (d,  $J = 66.2$  Hz, 1H), 6.98 (d,  $J = 90.7$  Hz, 1H), 6.77 – 6.72 (m, 1H), 4.80 (s, 2H), 3.74 (s, 3H), 3.63 – 3.55 (m, 4H), 2.26 – 2.19 (m, 4H), 2.14 (s, 3H). <sup>13</sup>C NMR (176 MHz, DMSO-*d*<sub>6</sub>) δ 158.7, 154.4, 150.7, 147.6, 143.0, 137.6, 136.2, 134.9, 132.5, 129.4, 124.2, 119.5, 118.6, 113.8, 110.0, 101.1, 94.6, 55.4, 54.3, 45.7, 43.8, 38.6. HRMS(ESI-TOF): calcd for  $C_{24}H_{26}N_{10}O$  (M+H)<sup>+</sup> 471.2364, found 471.2379.

*N-((6-methoxy-1H-benzo[d]imidazol-2-yl)methyl)-2-morpholino-9-(pyridin-3-yl)-9H-purin-6-amine (46)*. Compound **46** was prepared using general procedure in 62% yield over two steps as a white solid. <sup>1</sup>H NMR (400 MHz, DMSO-*d*<sub>6</sub>) δ 11.98 (s, 0.4H), 11.94 (s, 0.6H), 9.16 (d,  $J = 2.5$  Hz, 1H), 8.59 (dd,  $J = 1.5, 4.8$  Hz, 1H), 8.41 (s, 1H), 8.38 – 8.32 (m, 1H), 8.19 (s, 1H), 7.61 (ddd,  $J = 0.8, 4.7, 8.3$  Hz, 1H), 7.33 (dd,  $J = 8.7, 47.2$  Hz, 1H), 6.98 (dd,  $J = 2.4, 58.6$  Hz, 1H), 6.74 (td,  $J = 2.4, 8.7$  Hz, 1H), 4.80 (s, 2H), 3.74 (s, 3H), 3.53 (d,  $J = 18.6$  Hz, 8H). <sup>13</sup>C NMR (176 MHz, DMSO-*d*<sub>6</sub>) δ 158.8, 154.4, 150.6, 147.6, 143.0, 137.5, 136.3, 134.9, 132.5, 129.4, 124.2, 118.6, 114.0, 111.3, 110.0, 101.1, 94.6, 65.9, 55.4, 44.5, 38.6. HRMS(ESI-TOF): calcd for  $C_{23}H_{23}N_9O_2$  (M+H)<sup>+</sup> 458.2048, found 458.2060.

*N-((6-methoxy-1H-benzo[d]imidazol-2-yl)methyl)-2-(piperazin-1-yl)-9-(pyridin-3-yl)-9H-purin-6-amine (47, TFA salt)*. Compound **47** was prepared using general procedure in 71% yield over three steps (including Boc deprotection) as a yellow solid. <sup>1</sup>H NMR (700 MHz, DMSO-*d*<sub>6</sub>) δ 9.35 (s, 1H), 9.14 (d,  $J = 2.6$  Hz, 1H), 8.89 (s, 1H), 8.69 (s, 1H), 8.62 (d,  $J = 4.7$  Hz, 1H), 8.50 (s, 1H), 8.33 (d,  $J = 8.3$  Hz, 1H), 7.67 – 7.60 (m, 2H), 7.20 (d,  $J = 2.3$  Hz, 1H), 7.10 (dd,  $J = 2.3, 9.0$  Hz, 1H), 5.04 (d,  $J = 5.1$  Hz, 2H), 3.83 (s, 3H), 3.68 (s, 4H), 2.93 (s, 4H). <sup>13</sup>C NMR (176 MHz, DMSO-*d*<sub>6</sub>) δ 157.8, 157.6, 154.1, 152.6, 150.8, 147.9, 143.2, 137.5, 132.3, 132.2, 129.9, 125.5, 124.3, 115.0, 114.7, 114.2, 96.4, 55.8, 42.2, 40.8, 37.1. HRMS(ESI-TOF): calcd for  $C_{23}H_{24}N_{10}O$  (M+H)<sup>+</sup> 457.2207, found 457.2219.

*N-((5,6-difluoro-1H-benzo[d]imidazol-2-yl)methyl)-2-(4-methylpiperazin-1-yl)-9-(pyridin-3-yl)-9H-purin-6-amine (48)*. Compound **48** was prepared using general

procedure in 50% yield over two steps as a beige solid.  $^1\text{H}$  NMR (700 MHz,  $\text{DMSO-}d_6$ )  $\delta$  12.37 (s, 1H), 9.15 (s, 1H), 8.58 (d,  $J = 4.8$  Hz, 1H), 8.38 (s, 1H), 8.36 – 8.31 (m, 1H), 8.21 (s, 1H), 7.61 (dd,  $J = 4.7, 8.3$  Hz, 1H), 7.55 (t,  $J = 9.0$  Hz, 1H), 7.46 – 7.38 (m, 1H), 4.87 – 4.67 (m, 2H), 3.54 (s, 4H), 2.15 (s, 4H), 2.10 (s, 3H).  $^{13}\text{C}$  NMR (176 MHz,  $\text{DMSO-}d_6$ )  $\delta$  158.7, 155.5, 154.3, 150.7, 147.6, 146.2 (d,  $J = 233.7$  Hz, broad), 143.0, 138.5, 136.3, 132.5, 129.6, 129.4, 124.2, 113.8, 105.5, 99.1, 54.3, 45.8, 43.8, 38.7.  $^{19}\text{F}$  NMR (376 MHz,  $\text{DMSO-}d_6$ )  $\delta$  -145.1 (d,  $J = 22.6$  Hz), -146.5 (d,  $J = 22.2$  Hz). HRMS(ESI-TOF): calcd for  $\text{C}_{23}\text{H}_{22}\text{F}_2\text{N}_{10}$  ( $\text{M}+\text{H}$ ) $^+$  477.2070, found 477.2090.

*N-((5,6-difluoro-1H-benzo[d]imidazol-2-yl)methyl)-2-morpholino-9-(pyridin-3-yl)-9H-purin-6-amine (49)*. Compound **49** was prepared using general procedure in 50% yield over two steps as a white solid.  $^1\text{H}$  NMR (700 MHz,  $\text{DMSO-}d_6$ )  $\delta$  12.37 (s, 1H), 9.15 (s, 1H), 8.59 (d,  $J = 4.6$  Hz, 1H), 8.41 (s, 1H), 8.34 (d,  $J = 8.2$  Hz, 1H), 8.25 (s, 1H), 7.61 (dd,  $J = 4.7, 8.3$  Hz, 1H), 7.50 (s, 2H), 4.82 (s, 2H), 3.50 (d,  $J = 25.2$  Hz, 8H).  $^{13}\text{C}$  NMR (176 MHz,  $\text{DMSO-}d_6$ )  $\delta$  158.7, 155.5, 154.3, 150.7, 147.6, 146.2 (dd,  $J = 14.5, 236.3$  Hz), 143.1, 138.5, 136.4, 132.4, 129.6, 129.5, 124.2, 114.0, 105.5, 99.3, 65.9, 44.5, 38.6.  $^{19}\text{F}$  NMR (376 MHz,  $\text{DMSO-}d_6$ )  $\delta$  -144.9, -146.3. HRMS(ESI-TOF): calcd for  $\text{C}_{22}\text{H}_{19}\text{F}_2\text{N}_9\text{O}$  ( $\text{M}+\text{H}$ ) $^+$  464.1753, found 464.1752

*N-(benzo[d]oxazol-2-ylmethyl)-9-(3-fluorophenyl)-2-(tetrahydro-2H-pyran-4-yl)-9H-purin-6-amine (50)*. Compound **50** was prepared using general procedure in 41% yield over two steps as a white solid.  $^1\text{H}$  NMR (400 MHz,  $\text{DMSO-}d_6$ )  $\delta$  8.49 (s, 1H), 8.41 (s, 1H), 7.93 – 7.80 (m, 2H), 7.71 – 7.62 (m, 2H), 7.59 (td,  $J = 6.6, 8.2$  Hz, 1H), 7.37 – 7.30 (m, 2H), 7.22 (tdd,  $J = 0.9, 2.6, 8.5$  Hz, 1H), 4.85 (s, 2H), 3.52 – 3.38 (m, 8H).  $^{13}\text{C}$  NMR (101 MHz,  $\text{DMSO-}d_6$ )  $\delta$  164.9, 162.2 (d,  $J = 243.8$  Hz), 158.5, 154.1, 150.7, 150.1, 140.8, 137.1 (d,  $J = 10.9$  Hz), 136.8, 131.2 (d,  $J = 9.3$  Hz), 124.8, 124.3, 119.3, 117.6 (d,  $J = 2.9$  Hz), 114.0, 113.4 (d,  $J = 21.0$  Hz), 110.7, 109.1 (d,  $J = 26.0$  Hz), 65.8, 44.4, 38.2.  $^{19}\text{F}$  NMR (376 MHz,  $\text{DMSO-}d_6$ )  $\delta$  -111.0. LCMS(ESI): calcd for  $\text{C}_{24}\text{H}_{21}\text{FN}_6\text{O}_2$  ( $\text{M}+\text{H}$ ) $^+$  445.2, found 445.2

*N-(benzo[d]thiazol-2-ylmethyl)-9-(3-fluorophenyl)-2-morpholino-9H-purin-6-amine (51)*. Compound **51** was prepared using general procedure in 40% yield over two steps as a white solid.  $^1\text{H}$  NMR (400 MHz,  $\text{DMSO-}d_6$ )  $\delta$  8.66 (s, 1H), 8.41 (s, 1H), 8.00 (dd,  $J = 1.2, 8.0$  Hz, 1H), 7.94 (dd,  $J = 1.1, 8.1$  Hz, 1H), 7.93 – 7.83 (m, 2H), 7.60 (td,  $J = 6.6, 8.3$  Hz, 1H), 7.48 (ddd,  $J = 1.3, 7.2, 8.4$  Hz, 1H), 7.38 (ddd,  $J = 1.2, 7.2, 8.3$  Hz, 1H), 7.28 – 7.18 (m, 1H), 5.01 (s, 2H), 3.62 – 3.51 (m, 8H).  $^{13}\text{C}$  NMR (101 MHz,  $\text{DMSO-}d_6$ )  $\delta$  172.3, 162.2 (d,  $J = 243.6$  Hz), 158.6, 154.0, 152.6, 150.8, 137.1 (d,  $J = 10.7$  Hz), 136.9, 134.6, 131.2 (d,  $J = 9.2$  Hz), 126.0, 124.8, 122.2, 122.2, 117.7, 114.0, 113.4 (d,  $J = 21.0$  Hz), 109.1 (d,  $J = 26.1$  Hz), 65.9, 44.5, 42.7.  $^{19}\text{F}$  NMR (376 MHz,  $\text{DMSO-}d_6$ )  $\delta$  -111.0. HRMS(ESI-TOF): calcd for  $\text{C}_{23}\text{H}_{20}\text{FN}_7\text{OS}$  ( $\text{M}+\text{H}$ ) $^+$  462.1507, found 462.1528.

*9-(3-fluorophenyl)-2-morpholino-N-((4-phenyl-1H-imidazol-2-yl)methyl)-9H-purin-6-amine (52)*. Compound **52** was prepared using general procedure in 38% yield over two steps as a white solid.  $^1\text{H}$  NMR (400 MHz,  $\text{DMSO-}d_6$ )  $\delta$  11.82 (s, 1H), 8.39 (s, 1H), 8.04 (s, 1H), 7.89 (dd,  $J = 9.5, 19.7$  Hz, 2H), 7.73 (s, 2H), 7.60 (q,  $J = 7.8$  Hz, 1H), 7.48 (s, 1H), 7.32 (s, 2H), 7.26 – 7.19 (m, 1H), 7.16 (d,  $J = 7.7$  Hz, 1H), 4.68 (s, 2H), 3.61 (dd,  $J = 5.0, 13.4$  Hz, 8H).  $^{13}\text{C}$  NMR (176 MHz,  $\text{DMSO-}d_6$ )  $\delta$  162.2 (d,  $J = 243.1$  Hz),

158.8, 154.3, 150.5, 146.4, 139.3, 137.3, 136.4, 134.9, 131.2 (d,  $J = 9.3$  Hz), 128.4, 125.8, 124.0, 117.5, 114.1, 113.3 (d,  $J = 20.8$  Hz), 112.4, 108.9 (d,  $J = 26.0$  Hz), 66.0, 44.7, 38.0.  $^{19}\text{F}$  NMR (376 MHz,  $\text{DMSO-}d_6$ )  $\delta$  -111.0. HRMS(ESI-TOF): calcd for  $\text{C}_{25}\text{H}_{23}\text{FN}_8\text{O}$  ( $\text{M}+\text{H}$ ) $^+$  471.2052, found 471.2059.

*9-(3-fluorophenyl)-2-morpholino-N-((4-phenyloxazol-2-yl)methyl)-9H-purin-6-amine* (53). Compound **53** was prepared using general procedure in 31% yield over two steps as a white solid.  $^1\text{H}$  NMR (700 MHz,  $\text{DMSO-}d_6$ )  $\delta$  8.48 (s, 1H), 8.40 (d,  $J = 10.5$  Hz, 2H), 7.89 (d,  $J = 10.6$  Hz, 1H), 7.84 (d,  $J = 8.2$  Hz, 1H), 7.74 (d,  $J = 7.7$  Hz, 2H), 7.58 (q,  $J = 7.7$  Hz, 1H), 7.41 (t,  $J = 7.6$  Hz, 2H), 7.30 (t,  $J = 7.4$  Hz, 1H), 7.21 (td,  $J = 2.5, 8.5$  Hz, 1H), 4.72 (s, 2H), 3.62 – 3.45 (m, 8H).  $^{13}\text{C}$  NMR (176 MHz,  $\text{DMSO-}d_6$ )  $\delta$  162.6, 162.2 (d,  $J = 243.5$  Hz), 158.6, 154.1, 150.6, 139.6, 137.2 (d,  $J = 10.7$  Hz), 136.7, 134.7, 131.2 (d,  $J = 9.3$  Hz), 131.0, 128.7, 127.8, 125.0, 117.6, 114.0, 113.3 (d,  $J = 20.9$  Hz), 109.0 (d,  $J = 25.7$  Hz), 65.9, 44.5, 37.8.  $^{19}\text{F}$  NMR (376 MHz,  $\text{DMSO-}d_6$ )  $\delta$  -111.0. HRMS(ESI-TOF): calcd for  $\text{C}_{25}\text{H}_{22}\text{FN}_7\text{O}_2$  ( $\text{M}+\text{H}$ ) $^+$  472.1892, found 472.1891.

*9-(3-fluorophenyl)-2-morpholino-N-((4-phenylthiazol-2-yl)methyl)-9H-purin-6-amine* (54). Compound **54** was prepared using general procedure in 53% yield over two steps as a white solid.  $^1\text{H}$  NMR (700 MHz,  $\text{DMSO-}d_6$ )  $\delta$  8.60 (s, 1H), 8.40 (s, 1H), 7.98 – 7.88 (m, 4H), 7.85 (d,  $J = 8.2$  Hz, 1H), 7.58 (q,  $J = 7.7$  Hz, 1H), 7.43 (t,  $J = 7.6$  Hz, 2H), 7.32 (t,  $J = 7.4$  Hz, 1H), 7.21 (t,  $J = 8.6$  Hz, 1H), 5.01 – 4.86 (m, 2H), 3.66 – 3.54 (m, 8H).  $^{13}\text{C}$  NMR (176 MHz,  $\text{DMSO-}d_6$ )  $\delta$  170.7, 162.2 (d,  $J = 243.8$  Hz), 158.6, 154.0, 153.3, 150.7, 137.1 (d,  $J = 10.6$  Hz), 136.8, 134.2, 131.2 (d,  $J = 9.3$  Hz), 128.7, 127.9, 125.9, 117.6, 114.1, 114.0, 113.3 (d,  $J = 21.1$  Hz), 109.0 (d,  $J = 25.8$  Hz), 66.0, 44.6, 42.1.  $^{19}\text{F}$  NMR (376 MHz,  $\text{DMSO-}d_6$ )  $\delta$  -110.9. HRMS(ESI-TOF): calcd for  $\text{C}_{25}\text{H}_{22}\text{FN}_7\text{OS}$  ( $\text{M}+\text{H}$ ) $^+$  488.1663, found 488.1671.

*9-(3-fluorophenyl)-N-((5-(4-methylpiperazin-1-yl)pyridin-2-yl)methyl)-2-morpholino-9H-purin-6-amine* (55). Compound **55** was prepared using general procedure in 29% yield over two steps as a white solid.  $^1\text{H}$  NMR (400 MHz,  $\text{DMSO-}d_6$ )  $\delta$  8.37 (s, 1H), 8.19 (d,  $J = 2.7$  Hz, 1H), 8.10 (s, 1H), 7.91 (d,  $J = 10.7$  Hz, 2H), 7.86 (d,  $J = 8.1$  Hz, 1H), 7.63 – 7.56 (m, 1H), 7.29 (dd,  $J = 2.9, 8.7$  Hz, 1H), 7.22 (td,  $J = 2.4, 8.7$  Hz, 1H), 7.17 (d,  $J = 8.7$  Hz, 1H), 4.63 (s, 2H), 3.59 (s, 8H), 3.16 – 3.09 (m, 4H), 2.47 – 2.41 (m, 4H), 2.21 (s, 3H).  $^{13}\text{C}$  NMR (176 MHz,  $\text{DMSO-}d_6$ )  $\delta$  162.2 (d,  $J = 243.8$  Hz), 158.8, 154.3, 150.4, 149.3, 145.2, 137.3, 136.6, 136.4, 131.2 (d,  $J = 9.1$  Hz), 122.9, 121.0, 117.5, 114.0, 113.2 (d,  $J = 21.0$  Hz), 108.9 (d,  $J = 25.9$  Hz), 66.0, 54.0, 47.4, 45.2, 44.6, 42.8.  $^{19}\text{F}$  NMR (376 MHz,  $\text{DMSO-}d_6$ )  $\delta$  -111.0. HRMS(ESI-TOF): calcd for  $\text{C}_{26}\text{H}_{30}\text{FN}_9\text{O}$  ( $\text{M}+\text{H}$ ) $^+$  504.263, found 504.2632.

*9-(3-fluorophenyl)-N-(4-(4-methylpiperazin-1-yl)benzyl)-2-morpholino-9H-purin-6-amine* (56). Compound **56** was prepared using general procedure in 35% yield over two steps as a white solid.  $^1\text{H}$  NMR (400 MHz,  $\text{DMSO-}d_6$ )  $\delta$  8.34 (s, 1H), 8.14 (s, 1H), 7.94 – 7.82 (m, 2H), 7.59 (td,  $J = 6.7, 8.3$  Hz, 1H), 7.26 – 7.17 (m, 4H), 6.85 (d,  $J = 8.8$  Hz, 2H), 4.52 (s, 2H), 3.64 (s, 8H), 3.10 – 3.03 (m, 4H), 2.45 – 2.39 (m, 4H), 2.20 (s, 3H).  $^{13}\text{C}$  NMR (176 MHz,  $\text{DMSO-}d_6$ )  $\delta$  162.2 (d,  $J = 243.6$  Hz), 158.9, 154.3, 150.3, 149.9, 137.3 (d,  $J = 10.4$  Hz), 136.2, 131.2 (d,  $J = 9.1$  Hz), 130.6, 128.4, 117.5, 115.2, 114.0, 113.2 (d,  $J = 20.9$  Hz), 108.9 (d,  $J = 25.8$  Hz), 66.0, 54.6, 48.3, 45.7, 44.6, 42.5.  $^{19}\text{F}$

NMR (376 MHz, DMSO- $d_6$ )  $\delta$  -111.0 HRMS(ESI-TOF): calcd for C<sub>27</sub>H<sub>31</sub>FN<sub>8</sub>O (M+H)<sup>+</sup> 503.2678, found 503.2705.

*N-((1H-imidazol-2-yl)methyl)-9-(3-fluorophenyl)-2-morpholino-9H-purin-6-amine* (57). Compound **57** was prepared using general procedure in 41% yield over two steps as a white solid. <sup>1</sup>H NMR (700 MHz, DMSO- $d_6$ )  $\delta$  11.66 (s, 1H), 8.38 (s, 1H), 7.89 (dd,  $J$  = 9.6, 35.4 Hz, 3H), 7.60 (q,  $J$  = 7.7 Hz, 1H), 7.22 (td,  $J$  = 2.5, 8.4 Hz, 1H), 6.89 (s, 2H), 4.66 (s, 2H), 3.63 (s, 8H). <sup>13</sup>C NMR (176 MHz, DMSO- $d_6$ )  $\delta$  162.2 (d,  $J$  = 243.8 Hz), 158.8, 154.4, 150.5, 145.6, 137.3, 137.2, 136.4, 131.2 (d,  $J$  = 9.2 Hz), 117.5, 114.1, 113.3 (d,  $J$  = 20.7 Hz), 108.9 (d,  $J$  = 26.6 Hz), 66.0, 44.6, 37.8. <sup>19</sup>F NMR (376 MHz, DMSO- $d_6$ )  $\delta$  -111.0. HRMS(ESI-TOF): calcd for C<sub>19</sub>H<sub>19</sub>FN<sub>8</sub>O (M+H)<sup>+</sup> 395.1739, found 395.1753.

*9-(3-fluorophenyl)-2-morpholino-N-(pyridin-2-ylmethyl)-9H-purin-6-amine* (58, TFA salt). Compound **58** was prepared using general procedure in 40% yield over two steps as a white solid. <sup>1</sup>H NMR (700 MHz, DMSO- $d_6$ )  $\delta$  8.69 (dd,  $J$  = 1.6, 5.4 Hz, 1H), 8.47 – 8.38 (m, 2H), 8.18 (s, 1H), 7.89 (dt,  $J$  = 2.3, 10.6 Hz, 1H), 7.84 (dd,  $J$  = 2.0, 8.1 Hz, 1H), 7.71 (d,  $J$  = 8.0 Hz, 1H), 7.66 – 7.57 (m, 2H), 7.23 (td,  $J$  = 2.5, 8.5 Hz, 1H), 4.94 – 4.79 (m, 2H), 3.51 (d,  $J$  = 38.8 Hz, 8H). <sup>13</sup>C NMR (176 MHz, DMSO- $d_6$ )  $\delta$  162.2 (d,  $J$  = 243.5 Hz), 158.6, 155.6, 154.2, 150.6, 144.4, 142.1, 137.1, 136.9, 131.3, 123.8, 123.4, 117.7, 114.0, 113.4 (d,  $J$  = 21.5 Hz), 109.0 (d,  $J$  = 26.4 Hz), 65.9, 44.5, 43.4. <sup>19</sup>F NMR (376 MHz, DMSO- $d_6$ )  $\delta$  -74.6 (TFA), -111.0. HRMS(ESI-TOF): calcd for C<sub>21</sub>H<sub>20</sub>FN<sub>7</sub>O (M+H)<sup>+</sup> 406.1786, found 406.1797.

*9-(3-fluorophenyl)-2-morpholino-N-(pyridin-3-ylmethyl)-9H-purin-6-amine* (59). Compound **59** was prepared using general procedure in 60% yield over two steps as a white solid. <sup>1</sup>H NMR (700 MHz, DMSO- $d_6$ )  $\delta$  8.60 (d,  $J$  = 2.2 Hz, 1H), 8.42 (dd,  $J$  = 1.6, 4.8 Hz, 1H), 8.36 (s, 1H), 8.34 (s, 1H), 7.89 (dt,  $J$  = 2.3, 10.7 Hz, 1H), 7.84 (dd,  $J$  = 2.0, 8.1 Hz, 1H), 7.77 (dt,  $J$  = 2.0, 7.9 Hz, 1H), 7.59 (td,  $J$  = 6.6, 8.3 Hz, 1H), 7.33 (dd,  $J$  = 4.7, 7.8 Hz, 1H), 7.21 (td,  $J$  = 2.5, 8.5 Hz, 1H), 4.64 (d,  $J$  = 5.9 Hz, 2H), 3.62 (s, 8H). <sup>13</sup>C NMR (176 MHz, DMSO- $d_6$ )  $\delta$  162.2 (d,  $J$  = 243.7 Hz), 158.8, 154.2, 150.4, 149.0, 147.9, 137.2 (d,  $J$  = 10.7 Hz), 136.5, 135.8, 135.2, 131.2 (d,  $J$  = 9.1 Hz), 123.4, 117.6, 114.0, 113.3 (d,  $J$  = 20.8 Hz), 109.0 (d,  $J$  = 26.2 Hz), 66.0, 44.6, 40.9. <sup>19</sup>F NMR (376 MHz, DMSO- $d_6$ )  $\delta$  -111.0. LCMS(ESI): calcd for C<sub>21</sub>H<sub>20</sub>FN<sub>7</sub>O (M+H)<sup>+</sup> 406.2, found 406.2.

*9-(3-fluorophenyl)-N-((5-methylpyridin-2-yl)methyl)-2-morpholino-9H-purin-6-amine* (60). Compound **60** was prepared using general procedure in 40% yield over two steps as a white solid. <sup>1</sup>H NMR (700 MHz, DMSO- $d_6$ )  $\delta$  8.37 (s, 1H), 8.33 (d,  $J$  = 2.2 Hz, 1H), 8.17 (s, 1H), 7.91 (dt,  $J$  = 2.4, 10.7 Hz, 1H), 7.88 – 7.83 (m, 1H), 7.59 (td,  $J$  = 6.6, 8.2 Hz, 1H), 7.53 (dd,  $J$  = 2.2, 8.1 Hz, 1H), 7.22 (dd,  $J$  = 6.9, 8.4 Hz, 2H), 4.77 – 4.62 (m, 2H), 3.57 (s, 8H), 2.26 (s, 3H). <sup>13</sup>C NMR (176 MHz, DMSO- $d_6$ )  $\delta$  162.2 (d,  $J$  = 243.7 Hz), 158.8, 156.3, 154.3, 150.4, 148.8, 137.2 (d,  $J$  = 10.4 Hz), 136.9, 136.4, 131.2 (d,  $J$  = 9.3 Hz), 130.8, 120.5, 117.5, 114.0, 113.2 (d,  $J$  = 20.9 Hz), 108.9 (d,  $J$  = 25.8 Hz), 66.0, 44.9, 44.5, 17.5. <sup>19</sup>F NMR (376 MHz, DMSO- $d_6$ )  $\delta$  -111.0. HRMS(ESI-TOF): calcd for C<sub>22</sub>H<sub>22</sub>FN<sub>7</sub>O (M+H)<sup>+</sup> 420.1943, found 420.1941.

*9-(3-fluorophenyl)-N-((6-methylpyridin-2-yl)methyl)-2-morpholino-9H-purin-6-amine (61)*. Compound **61** was prepared using general procedure in 41% yield over two steps as a white solid. <sup>1</sup>H NMR (400 MHz, DMSO-*d*<sub>6</sub>) δ 8.37 (s, 1H), 8.20 (s, 1H), 7.96 – 7.76 (m, 2H), 7.59 (tt, *J* = 3.9, 8.2 Hz, 2H), 7.22 (td, *J* = 2.5, 8.5 Hz, 1H), 7.10 (dd, *J* = 7.6, 10.4 Hz, 2H), 4.67 (s, 2H), 3.57 (s, 8H), 2.45 (s, 3H). <sup>13</sup>C NMR (101 MHz, DMSO-*d*<sub>6</sub>) δ 162.2 (d, *J* = 243.7 Hz), 158.8, 158.7, 156.9, 154.3, 150.4, 137.2 (d, *J* = 10.6 Hz), 136.8, 136.4, 131.2 (d, *J* = 9.2 Hz), 121.1, 117.9, 117.5, 114.0, 113.2 (d, *J* = 21.0 Hz), 108.9 (d, *J* = 25.9 Hz), 66.0, 45.3, 44.5, 24.0. <sup>19</sup>F NMR (376 MHz, DMSO-*d*<sub>6</sub>) δ -111.0. HRMS(ESI-TOF): calcd for C<sub>22</sub>H<sub>22</sub>FN<sub>7</sub>O (M+H)<sup>+</sup> 420.1943, found 420.1960.

*N-(2-fluorobenzyl)-9-(3-fluorophenyl)-2-morpholino-9H-purin-6-amine (62)*. Compound **62** was prepared using general procedure in 45% yield over two steps as a white solid. <sup>1</sup>H NMR (400 MHz, DMSO-*d*<sub>6</sub>) δ 8.40 (s, 1H), 8.26 (s, 1H), 7.99 – 7.78 (m, 2H), 7.59 (td, *J* = 6.6, 8.3 Hz, 1H), 7.41 (td, *J* = 1.8, 7.7 Hz, 1H), 7.32 – 7.04 (m, 4H), 4.69 (s, 2H), 3.60 (s, 8H). <sup>13</sup>C NMR (101 MHz, DMSO-*d*<sub>6</sub>) δ 162.2 (d, *J* = 243.7 Hz), 160.1 (d, *J* = 244.2 Hz), 154.2, 150.4, 137.1 (d, *J* = 10.9 Hz), 136.5, 131.2 (d, *J* = 9.2 Hz), 129.5, 128.6 (d, *J* = 8.1 Hz), 126.9 (d, *J* = 14.5 Hz), 124.2 (d, *J* = 3.3 Hz), 117.7, 115.0 (d, *J* = 21.4 Hz), 113.5, 113.3, 109.1 (d, *J* = 25.9 Hz), 66.0, 44.6, 36.6. <sup>19</sup>F NMR (376 MHz, DMSO-*d*<sub>6</sub>) δ -111.0, -119.2. HRMS(ESI-TOF): calcd for C<sub>22</sub>H<sub>20</sub>F<sub>2</sub>N<sub>6</sub>O (M+H)<sup>+</sup> 423.1739, found 423.1752.

*N6-(((4,5-difluoro-1H-benzo[d]imidazol-2-yl)methyl)-9-(3-fluorophenyl)-9H-purine-2,6-diamine (63)*. Compound **63** was prepared using general procedure in 33% yield over two steps as a white solid. <sup>1</sup>H NMR (400 MHz, DMSO-*d*<sub>6</sub>) δ 8.59 (s, 1H), 8.38 (s, 1H), 7.81 (d, *J* = 48.8 Hz, 2H), 7.62 (td, *J* = 6.4, 8.2 Hz, 1H), 7.36 – 7.18 (m, 4H), 4.91 (s, 2H). <sup>19</sup>F NMR (376 MHz, DMSO-*d*<sub>6</sub>) δ -111.0, -149.3, -155.2. HRMS(ESI-TOF): calcd for C<sub>19</sub>H<sub>13</sub>F<sub>3</sub>N<sub>8</sub> (M+H)<sup>+</sup> 411.1288, found 411.1310.

*2-(((6-(((4,5-difluoro-1H-benzo[d]imidazol-2-yl)methyl)amino)-9-(3-fluorophenyl)-9H-purin-2-yl)amino)ethan-1-ol (64)*. Compound **64** was prepared using general procedure in 70% yield over two steps as a white solid. <sup>1</sup>H NMR (400 MHz, DMSO-*d*<sub>6</sub>) δ 8.38 (s, 2H), 7.94 (d, *J* = 10.6 Hz, 1H), 7.83 (d, *J* = 7.7 Hz, 1H), 7.60 (td, *J* = 6.6, 8.3 Hz, 1H), 7.34 – 7.19 (m, 3H), 4.88 (s, 2H), 3.27 (s, 2H). <sup>19</sup>F NMR (376 MHz, DMSO-*d*<sub>6</sub>) δ -111.0, -149.2, -155.2 (d, *J* = 21.8 Hz). HRMS(ESI-TOF): calcd for C<sub>21</sub>H<sub>17</sub>F<sub>3</sub>N<sub>8</sub>O (M+H)<sup>+</sup> 455.1550, found 455.1564.

*N-(((4,5-difluoro-1H-benzo[d]imidazol-2-yl)methyl)-9-(3-fluorophenyl)-2-thiomorpholino-9H-purin-6-amine (65)*. Compound **65** was prepared using general procedure in 63% yield over two steps as a beige solid. <sup>1</sup>H NMR (700 MHz, DMSO-*d*<sub>6</sub>) δ 12.56 (s, 1H), 8.40 (s, 1H), 8.32 (d, *J* = 6.4 Hz, 1H), 7.88 (dt, *J* = 2.3, 10.7 Hz, 1H), 7.83 (dd, *J* = 2.0, 8.2 Hz, 1H), 7.60 (td, *J* = 6.5, 8.3 Hz, 1H), 7.26 – 7.11 (m, 3H), 5.00 – 4.69 (m, 2H), 3.89 (s, 4H), 2.30 (s, 4H). <sup>13</sup>C NMR (176 MHz, DMSO-*d*<sub>6</sub>) δ 162.2 (d, *J* = 243.8 Hz), 157.9, 156.0, 154.4, 150.7, 144.8 (dd, *J* = 9.2, 233.6 Hz), 140.0 (dd, *J* = 14.5, 250.7 Hz), 137.2 (d, *J* = 10.8 Hz), 136.6, 133.1 (d, *J* = 7.5 Hz), 132.5 (d, *J* = 12.0 Hz), 131.2 (d, *J* = 9.3 Hz), 117.6, 113.9, 113.3 (d, *J* = 20.9 Hz), 110.7 (d, *J* = 20.9 Hz), 109.0 (d, *J* = 25.7 Hz), 106.7, 46.5, 38.9, 25.3. <sup>19</sup>F NMR (376 MHz, DMSO-*d*<sub>6</sub>) δ -111.0, -150.4 (d, *J* =

21.5 Hz), -155.8 (d,  $J = 21.5$  Hz). HRMS(ESI-TOF): calcd for  $C_{23}H_{19}F_3N_8S$  (M+H)<sup>+</sup> 497.1478, found 497.1474.

4-(6-(((4,5-difluoro-1H-benzo[d]imidazol-2-yl)methyl)amino)-9-(3-fluorophenyl)-9H-purin-2-yl)thiomorpholine 1,1-dioxide (**66**). Compound **66** was prepared using general procedure in 52% yield over two steps as a white solid. <sup>1</sup>H NMR (700 MHz, DMSO-*d*<sub>6</sub>) δ 12.55 (s, 1H), 8.48 (s, 1H), 8.43 (d,  $J = 7.5$  Hz, 1H), 7.85 (d,  $J = 10.5$  Hz, 1H), 7.81 (d,  $J = 8.2$  Hz, 1H), 7.60 (td,  $J = 4.4, 8.6$  Hz, 1H), 7.30 – 7.04 (m, 3H), 4.93 – 4.76 (m, 2H), 4.05 (s, 4H), 2.84 (s, 4H). <sup>13</sup>C NMR (176 MHz, DMSO-*d*<sub>6</sub>) δ 162.2 (d,  $J = 243.9$  Hz), 157.2, 155.9, 154.6, 150.5, 144.9 (dd,  $J = 9.7, 233.2$  Hz), 140.0 (dd,  $J = 15.5, 251.0$  Hz), 137.3, 136.9 (d,  $J = 10.7$  Hz), 133.0 (d,  $J = 7.5$  Hz), 132.4 (d,  $J = 11.5$  Hz), 131.3 (d,  $J = 9.2$  Hz), 118.0, 114.6, 113.6 (d,  $J = 21.1$  Hz), 110.8 (d,  $J = 21.2$  Hz), 109.4 (d,  $J = 25.9$  Hz), 106.8, 50.3, 42.9, 38.8. <sup>19</sup>F NMR (376 MHz, DMSO-*d*<sub>6</sub>) δ -110.9 (d,  $J = 5.7$  Hz), -150.3 (d,  $J = 21.5$  Hz), -155.6 (d,  $J = 21.6$  Hz). HRMS(ESI-TOF): calcd for  $C_{23}H_{19}F_3N_8O_2S$  (M+H)<sup>+</sup> 529.1377, found 529.1371.

*N*-(((4,5-difluoro-1H-benzo[d]imidazol-2-yl)methyl)-9-(3-fluorophenyl)-2-(4-methoxypiperidin-1-yl)-9H-purin-6-amine (**67**). Compound **67** was prepared using general procedure in 41% yield over two steps as a white solid. <sup>1</sup>H NMR (700 MHz, DMSO-*d*<sub>6</sub>) δ 12.55 (s, 1H), 8.38 (s, 1H), 8.23 (s, 1H), 7.91 (dt,  $J = 2.3, 10.7$  Hz, 1H), 7.85 (dd,  $J = 2.0, 8.1$  Hz, 1H), 7.60 (td,  $J = 6.5, 8.3$  Hz, 1H), 7.25 – 7.10 (m, 3H), 4.80 (s, 2H), 4.06 (s, 2H), 3.27 (s, 1H), 3.16 (s, 3H), 3.09 (s, 2H), 1.61 (d,  $J = 12.5$  Hz, 2H), 1.07 (s, 2H). <sup>13</sup>C NMR (176 MHz, DMSO-*d*<sub>6</sub>) δ 162.2 (d,  $J = 243.6$  Hz), 158.4, 156.1, 154.3, 150.8, 144.9 (d,  $J = 236.9$  Hz), 140.0 (d,  $J = 245.4$  Hz), 137.3 (d,  $J = 10.6$  Hz), 136.3, 133.1, 132.5, 131.2 (d,  $J = 9.3$  Hz), 117.4, 113.8, 113.2 (d,  $J = 21.0$  Hz), 110.6, 108.9 (d,  $J = 26.4$  Hz), 106.7, 75.8, 54.6, 41.6, 38.8, 30.0. <sup>19</sup>F NMR (376 MHz, DMSO-*d*<sub>6</sub>) δ -111.0, -150.6 (d,  $J = 20.9$  Hz), -155.8 (d,  $J = 21.3$  Hz). HRMS(ESI-TOF): calcd for  $C_{25}H_{23}F_3N_8O$  (M+H)<sup>+</sup> 509.2020, found 509.2014.

(1-(6-(((4,5-difluoro-1H-benzo[d]imidazol-2-yl)methyl)amino)-9-(3-fluorophenyl)-9H-purin-2-yl)piperidin-4-yl)methanol (**68**). Compound **68** was prepared using general procedure in 14% yield over two steps as a beige solid. <sup>1</sup>H NMR (400 MHz, DMSO-*d*<sub>6</sub>) δ 12.56 (s, 1H), 8.38 (s, 1H), 8.17 (s, 1H), 7.93 (dt,  $J = 2.3, 10.8$  Hz, 1H), 7.88 – 7.81 (m, 1H), 7.60 (td,  $J = 6.6, 8.3$  Hz, 1H), 7.27 – 7.08 (m, 3H), 4.81 (s, 2H), 4.49 (d,  $J = 12.8$  Hz, 2H), 4.37 (s, 1H), 3.21 – 3.03 (m, 3H), 2.66 (t,  $J = 12.8$  Hz, 2H), 1.51 (s, 2H), 0.83 (s, 2H). <sup>19</sup>F NMR (376 MHz, DMSO-*d*<sub>6</sub>) δ -111.0, -150.6, -155.8. HRMS(ESI-TOF): calcd for  $C_{25}H_{23}F_3N_8O$  (M+H)<sup>+</sup> 509.2020, found 509.2007.

*N*6-(((4,5-difluoro-1H-benzo[d]imidazol-2-yl)methyl)-9-(3-fluorophenyl)-*N*2-((tetrahydro-2H-pyran-4-yl)methyl)-9H-purine-2,6-diamine (**69**). Compound **69** was prepared using general procedure in 33% yield over two steps as a beige solid. <sup>1</sup>H NMR (400 MHz, DMSO-*d*<sub>6</sub>) δ 12.48 (s, 1H), 8.34 (s, 1H), 8.06 (d,  $J = 41.8$  Hz, 2H), 7.84 (s, 1H), 7.58 (td,  $J = 6.6, 8.3$  Hz, 1H), 7.25 – 7.09 (m, 3H), 6.80 (s, 1H), 4.84 (s, 2H), 3.62 (s, 2H), 3.23 – 2.58 (m, 4H), 1.97 – 1.16 (m, 2H), 1.05 – 0.80 (m, 3H). <sup>19</sup>F NMR (376 MHz, DMSO-*d*<sub>6</sub>) δ -111.27, -150.57, -155.81. HRMS(ESI-TOF): calcd for  $C_{25}H_{23}F_3N_8O$  (M+H)<sup>+</sup> 509.2020, found 509.2038.

*N6-((4,5-difluoro-1H-benzo[d]imidazol-2-yl)methyl)-9-(3-fluorophenyl)-N2-(2-morpholinoethyl)-9H-purine-2,6-diamine (70)*. Compound **70** was prepared using general procedure in 30% yield over two steps as a beige solid. <sup>1</sup>H NMR (700 MHz, DMSO-*d*<sub>6</sub>) δ 12.51 (s, 1H), 8.34 (s, 1H), 8.12 (d, *J* = 23.4 Hz, 1H), 8.04 – 7.90 (m, 1H), 7.84 (d, *J* = 8.0 Hz, 1H), 7.58 (td, *J* = 6.5, 8.2 Hz, 1H), 7.28 – 7.11 (m, 3H), 6.55 (s, 1H), 4.85 (s, 2H), 3.61 – 3.41 (m, 6H), 2.46 – 2.08 (m, 6H). <sup>13</sup>C NMR (176 MHz, DMSO-*d*<sub>6</sub>) δ 162.2 (d, *J* = 243.5 Hz), 161.1, 159.4, 155.9, 154.8, 144.9 (d, *J* = 228.4 Hz), 140.0 (d, *J* = 237.6 Hz), 137.3 (d, *J* = 10.7 Hz), 135.7, 133.1, 132.5, 131.1 (d, *J* = 9.3 Hz), 117.5, 114.1, 113.2 (d, *J* = 20.8 Hz), 110.7, 109.0, 106.8, 66.0, 57.4, 53.2, 38.0, 34.3. <sup>19</sup>F NMR (376 MHz, DMSO-*d*<sub>6</sub>) δ -111.2, -150.4, -155.7. HRMS(ESI-TOF): calcd for C<sub>25</sub>H<sub>24</sub>F<sub>3</sub>N<sub>9</sub>O (M+H)<sup>+</sup> 524.2129, found 524.2114.

*N6-((4,5-difluoro-1H-benzo[d]imidazol-2-yl)methyl)-9-(3-fluorophenyl)-N2-(3-morpholinopropyl)-9H-purine-2,6-diamine (71)*. Compound **71** was prepared using general procedure in 60% yield over two steps as a beige solid. <sup>1</sup>H NMR (700 MHz, DMSO-*d*<sub>6</sub>) δ 12.54 (s, 1H), 8.33 (s, 1H), 8.11 (s, 1H), 8.00 (s, 1H), 7.84 (s, 1H), 7.58 (q, *J* = 7.8 Hz, 1H), 7.26 – 7.11 (m, 3H), 6.73 (s, 1H), 4.85 (s, 2H), 3.67 – 3.09 (m, 6H), 2.45 – 2.03 (m, 6H), 1.69 (s, 2H). <sup>13</sup>C NMR (176 MHz, DMSO-*d*<sub>6</sub>) δ 162.2 (d, *J* = 243.5 Hz), 159.6, 155.9, 154.7, 150.9, 144.9 (d, *J* = 234.8 Hz), 140.0 (d, *J* = 250.1 Hz), 137.4 (d, *J* = 10.4 Hz), 135.7, 133.1, 132.5, 131.1 (d, *J* = 9.4 Hz), 117.5, 114.0, 113.2 (d, *J* = 20.9 Hz), 110.6, 109.0, 106.8, 65.9, 56.1, 53.0, 38.4, 25.7, 20.7. <sup>19</sup>F NMR (376 MHz, DMSO-*d*<sub>6</sub>) δ -111.1, -150.4, -155.7 (d, *J* = 21.0 Hz). HRMS(ESI-TOF): calcd for C<sub>26</sub>H<sub>26</sub>F<sub>3</sub>N<sub>9</sub>O (M+H)<sup>+</sup> 538.2285, found 538.2274.

*N2-butyl-N6-((4,5-difluoro-1H-benzo[d]imidazol-2-yl)methyl)-9-(3-fluorophenyl)-9H-purine-2,6-diamine (72)*. Compound **72** was prepared using general procedure in 48% yield over two steps as a white solid. <sup>1</sup>H NMR (400 MHz, DMSO-*d*<sub>6</sub>) δ 12.49 (s, 1H), 8.34 (s, 1H), 8.02 (s, 2H), 7.85 (d, *J* = 8.1 Hz, 1H), 7.58 (td, *J* = 6.6, 8.3 Hz, 1H), 7.26 – 7.10 (m, 3H), 6.67 (s, 1H), 4.85 (s, 2H), 3.14 (s, 2H), 1.63 – 1.03 (m, 4H), 0.76 (s, 3H). <sup>13</sup>C NMR (176 MHz, DMSO-*d*<sub>6</sub>) δ 162.2 (d, *J* = 243.4 Hz), 159.6, 156.0, 154.7, 151.1, 144.9 (dd, *J* = 9.2, 233.8 Hz), 140.0 (dd, *J* = 15.2, 250.9 Hz), 137.4 (d, *J* = 10.5 Hz), 135.6, 133.1, 132.6, 131.1 (d, *J* = 9.1 Hz), 117.4, 114.0, 113.1 (d, *J* = 20.9 Hz), 110.7, 108.8, 106.8, 40.7, 38.3, 31.3, 19.6, 13.6. <sup>19</sup>F NMR (376 MHz, DMSO-*d*<sub>6</sub>) δ -111.2, -150.5, -155.8. HRMS(ESI-TOF): calcd for C<sub>23</sub>H<sub>21</sub>F<sub>3</sub>N<sub>8</sub> (M+H)<sup>+</sup> 467.1914, found 467.1930.

*N-((4,5-difluoro-1H-benzo[d]imidazol-2-yl)methyl)-2-(4-(dimethylamino)piperidin-1-yl)-9-(3-fluorophenyl)-9H-purin-6-amine (73)*. Compound **73** was prepared using general procedure in 54% yield over two steps as a beige solid. <sup>1</sup>H NMR (400 MHz, DMSO-*d*<sub>6</sub>) δ 12.61 (s, 1H), 8.41 (s, 1H), 8.33 (s, 1H), 7.91 (dt, *J* = 2.3, 10.7 Hz, 1H), 7.88 – 7.81 (m, 1H), 7.61 (td, *J* = 6.6, 8.3 Hz, 1H), 7.29 – 7.09 (m, 3H), 4.80 (s, 2H), 3.38 – 3.28 (m, 4H), 2.40 (s, 6H), 1.80 – 1.53 (m, 2H), 1.28 – 1.01 (m, 3H). <sup>19</sup>F NMR (376 MHz, DMSO-*d*<sub>6</sub>) δ -111.0, -150.5 (d, *J* = 21.5 Hz), -155.7 (d, *J* = 21.7 Hz). HRMS(ESI-TOF): calcd for C<sub>26</sub>H<sub>26</sub>F<sub>3</sub>N<sub>9</sub> (M+H)<sup>+</sup> 522.2336, found 522.2328.

*N6-((4,5-difluoro-1H-benzo[d]imidazol-2-yl)methyl)-9-(3-fluorophenyl)-N2-(1-methylpiperidin-4-yl)-9H-purine-2,6-diamine (74)*. Compound **74** was prepared using



general procedure in 45% yield over two steps as a beige solid.  $^1\text{H}$  NMR (400 MHz,  $\text{DMSO-}d_6$ )  $\delta$  8.39 (s, 1H), 8.23 (s, 1H), 7.91 (dt,  $J = 2.3, 10.7$  Hz, 1H), 7.87 – 7.80 (m, 1H), 7.59 (dtd,  $J = 6.6, 8.3, 12.9$  Hz, 1H), 7.28 – 7.08 (m, 4H), 4.81 (s, 2H), 4.51 – 4.27 (m, 2H), 2.99 – 2.69 (m, 3H), 1.72 – 1.57 (m, 2H), 1.31 – 1.18 (m, 3H), 1.11 – 0.99 (m, 2H).  $^{19}\text{F}$  NMR (376 MHz,  $\text{DMSO-}d_6$ )  $\delta$  -111.0, -150.2, -155.8 (d,  $J = 21.7$  Hz). HRMS(ESI-TOF): calcd for  $\text{C}_{25}\text{H}_{24}\text{F}_3\text{N}_9$  ( $\text{M}+\text{H}$ ) $^+$  508.2180, found 508.2166.

*1-(6-(((4,5-difluoro-1H-benzo[d]imidazol-2-yl)methyl)amino)-9-(3-fluorophenyl)-9H-purin-2-yl)piperidin-4-one (75)*. Compound **75** was prepared using general procedure in 60% yield over three steps (including deprotection) as a beige solid.  $^1\text{H}$  NMR (700 MHz,  $\text{DMSO-}d_6$ )  $\delta$  12.56 (s, 1H), 8.43 (s, 1H), 8.37 (s, 1H), 7.91 (dt,  $J = 2.3, 10.6$  Hz, 1H), 7.86 (dd,  $J = 2.0, 8.1$  Hz, 1H), 7.61 (td,  $J = 6.5, 8.2$  Hz, 1H), 7.23 (qd,  $J = 2.9, 9.0, 9.5$  Hz, 2H), 7.16 (dt,  $J = 7.9, 11.5$  Hz, 1H), 4.90 – 4.72 (m, 2H), 3.87 (t,  $J = 6.2$  Hz, 4H), 2.10 (s, 4H).  $^{13}\text{C}$  NMR (176 MHz,  $\text{DMSO-}d_6$ )  $\delta$  208.0, 162.2 (d,  $J = 243.9$  Hz), 158.0, 155.9, 154.6, 150.7, 144.9 (dd,  $J = 10.0, 233.4$  Hz), 140.1 (d,  $J = 251.9$  Hz), 137.1 (d,  $J = 11.2$  Hz), 136.7, 133.2, 132.6, 131.3 (d,  $J = 9.1$  Hz), 117.6, 114.3, 113.4 (d,  $J = 20.8$  Hz), 110.6 (d,  $J = 22.0$  Hz), 109.0 (d,  $J = 26.4$  Hz), 107.0, 43.3, 40.2, 38.8.  $^{19}\text{F}$  NMR (376 MHz,  $\text{DMSO-}d_6$ )  $\delta$  -111.0, -150.2, -155.7 (d,  $J = 21.8$  Hz). HRMS(ESI-TOF): calcd for  $\text{C}_{24}\text{H}_{19}\text{F}_3\text{N}_8\text{O}$  ( $\text{M}+\text{H}$ ) $^+$  493.1707, found 493.1701.

*N-((4,5-difluoro-1H-benzo[d]imidazol-2-yl)methyl)-9-(3-fluorophenyl)-2-(4-(methylamino)piperidin-1-yl)-9H-purin-6-amine (76, TFA salt)*. Compound **76** was prepared using general procedure in 74% yield over three steps (including Boc deprotection) as a beige solid.  $^1\text{H}$  NMR (700 MHz,  $\text{DMSO-}d_6$ )  $\delta$  8.43 (s, 1H), 8.36 (s, 1H), 7.90 (dt,  $J = 2.3, 10.6$  Hz, 1H), 7.84 (dd,  $J = 2.0, 8.1$  Hz, 1H), 7.61 (td,  $J = 6.6, 8.2$  Hz, 1H), 7.30 – 7.22 (m, 2H), 7.19 (qd,  $J = 4.3, 8.2, 9.0$  Hz, 1H), 4.83 (s, 2H), 4.61 – 4.47 (m, 2H), 3.14 (s, 1H), 2.79 – 2.69 (m, 2H), 2.48 – 2.45 (m, 3H), 1.87 – 1.70 (m, 2H), 1.21 – 1.01 (m, 2H).  $^{13}\text{C}$  NMR (176 MHz,  $\text{DMSO-}d_6$ )  $\delta$  162.3 (d,  $J = 243.9$  Hz), 158.1, 156.0, 154.3, 150.7, 145.1 (d,  $J = 234.9$  Hz), 139.1 (d,  $J = 233.8$  Hz), 137.1 (d,  $J = 11.0$  Hz), 136.7, 134.1, 133.3, 131.3 (d,  $J = 9.3$  Hz), 117.6, 114.0, 113.4 (d,  $J = 20.7$  Hz), 111.0, 109.0 (d,  $J = 25.8$  Hz), 108.1, 55.4, 42.2, 38.7, 29.1, 27.1.  $^{19}\text{F}$  NMR (376 MHz,  $\text{DMSO-}d_6$ )  $\delta$  -74.4 (TFA), -111.0, -149.5, -155.3 (d,  $J = 23.7$  Hz). HRMS(ESI-TOF): calcd for  $\text{C}_{25}\text{H}_{24}\text{F}_3\text{N}_9$  ( $\text{M}+\text{H}$ ) $^+$  508.2180, found 508.2167.

Compound 28, <sup>1</sup>H NMR:

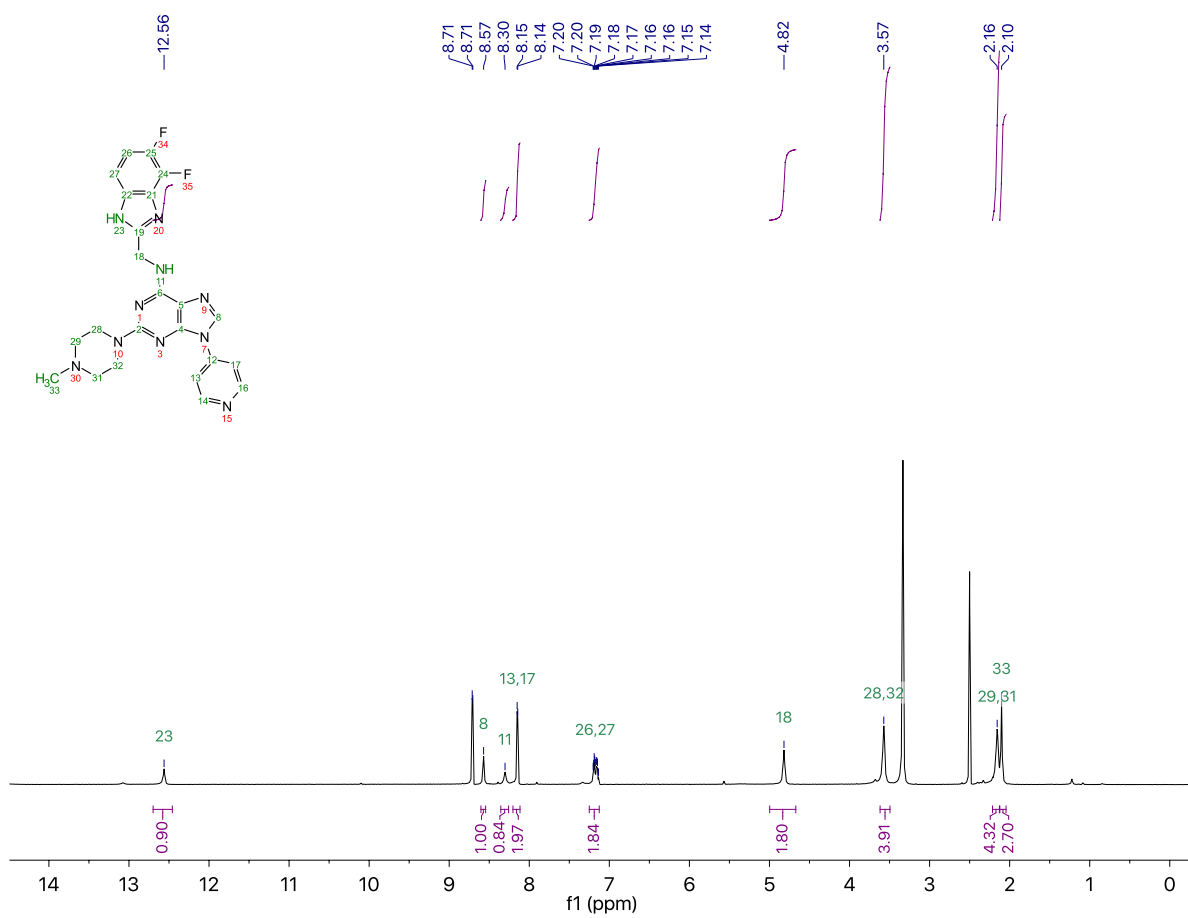

Compound 28, <sup>13</sup>C NMR:

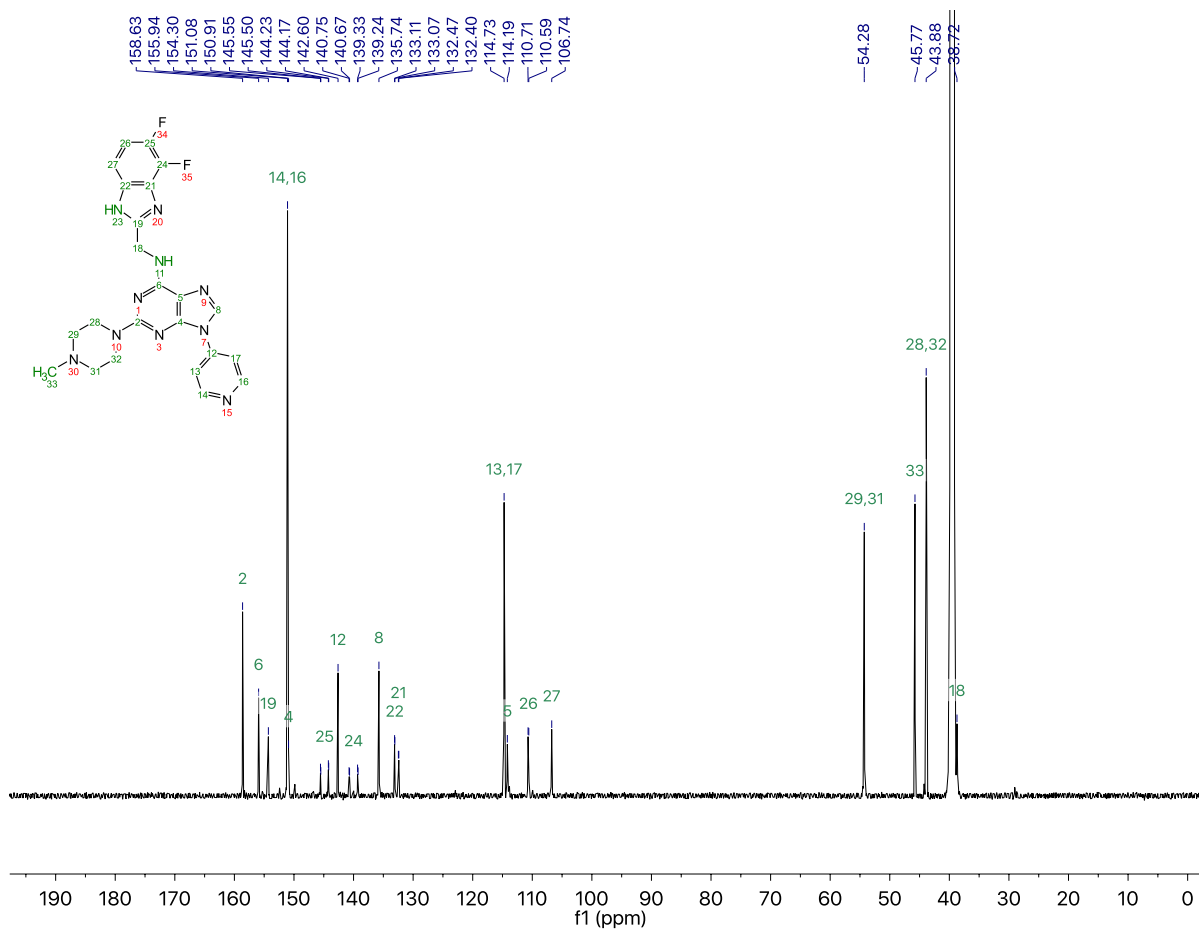

Compound 28, DEPT-135:

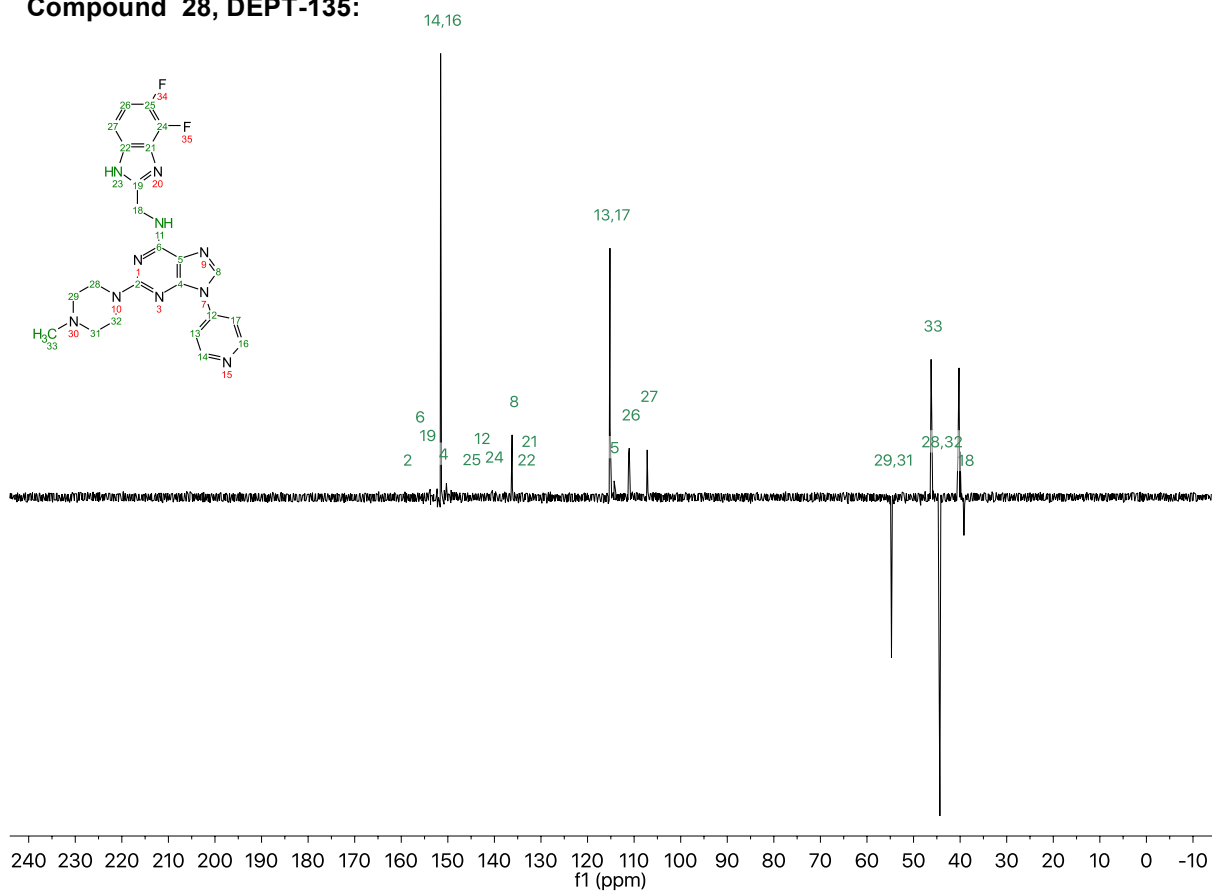

Compound 28, <sup>19</sup>F NMR:

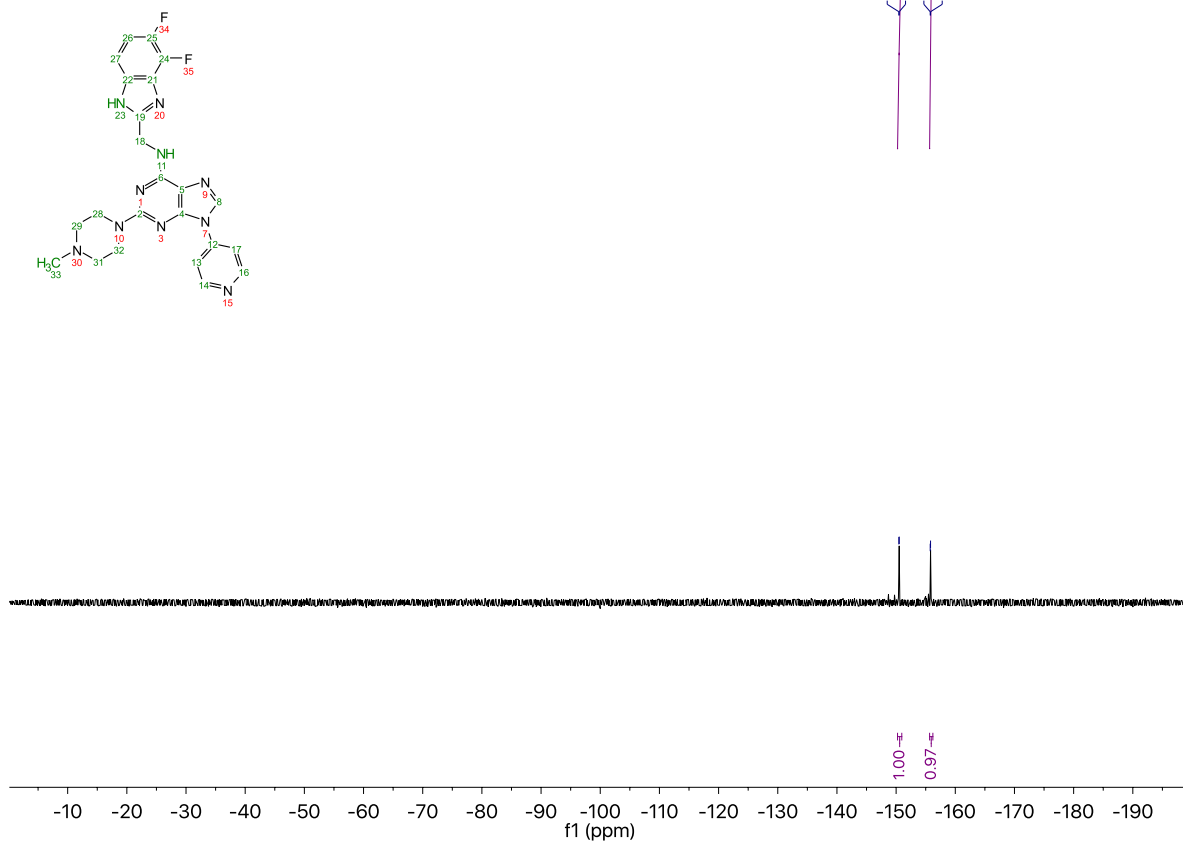

Compound 28, COSY:

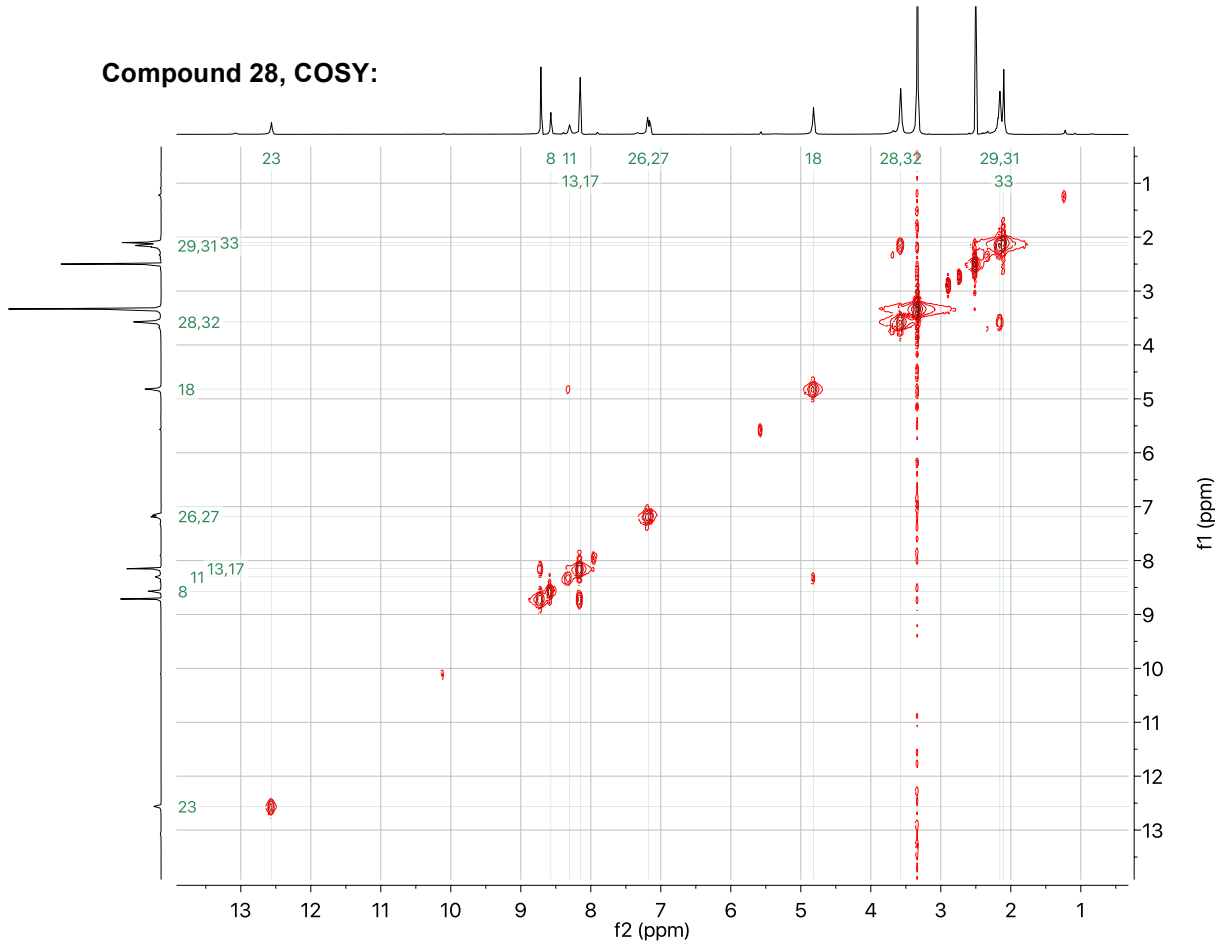

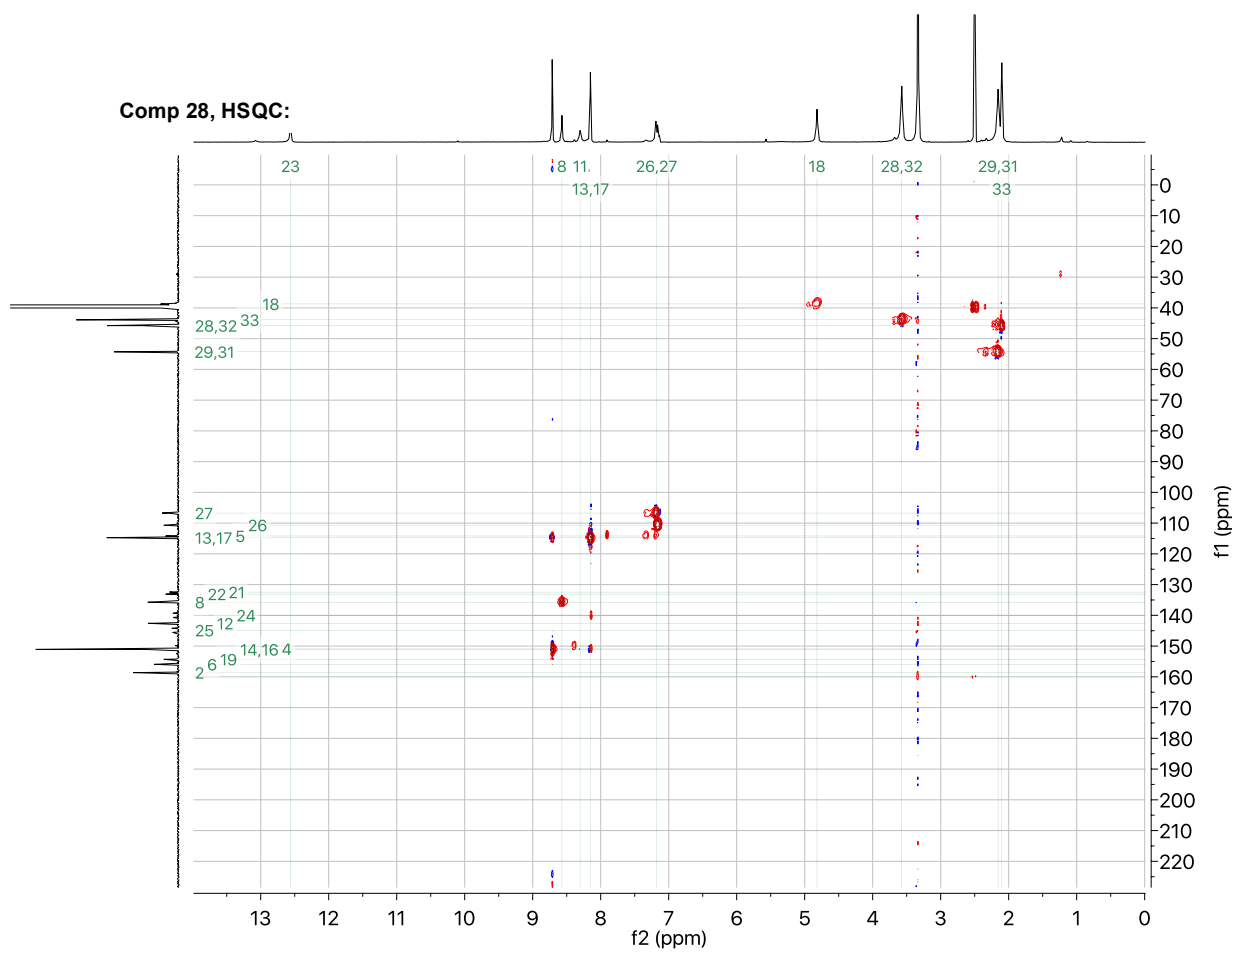

Compound 28, HMBC:

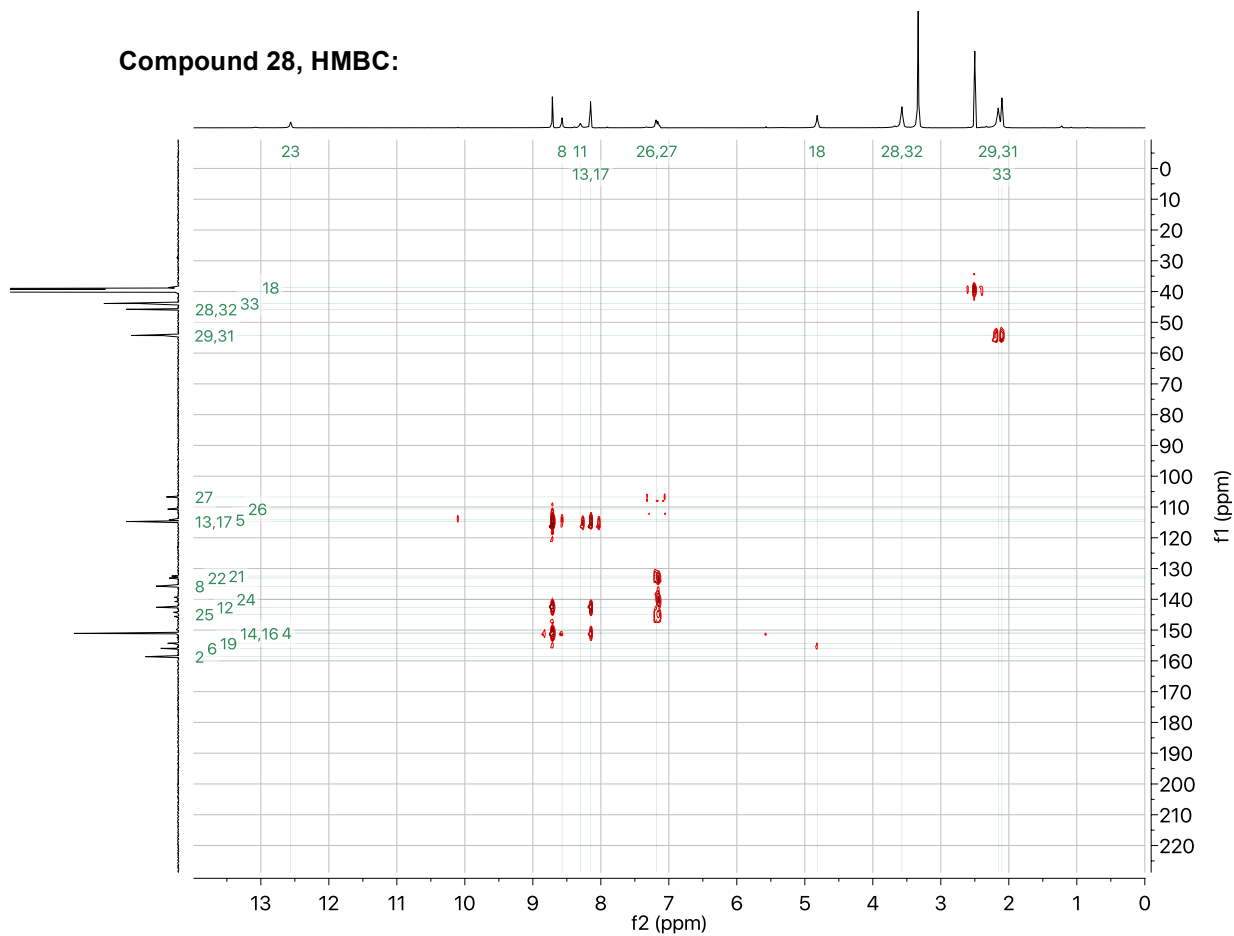



| Cmpd | CK1δ                     | CK1ε                     | MDA-<br>MB-231           | PAMPA                               | Solubility | Microsome<br>stability,<br>min | CYP % inhibition |     |     |     |
|------|--------------------------|--------------------------|--------------------------|-------------------------------------|------------|--------------------------------|------------------|-----|-----|-----|
|      | IC <sub>50</sub><br>(nM) | IC <sub>50</sub><br>(nM) | EC <sub>50</sub><br>(nM) | P <sub>app</sub> · 10 <sup>-6</sup> | (μM)       | (H/M/R)                        | 1A2              | 2C9 | 2D6 | 3A4 |
| 11   | > 10000                  | > 10000                  |                          |                                     |            |                                |                  |     |     |     |
| 12   | 4010                     | 6560                     |                          |                                     |            | 16 / 3 / 5                     | 40               | 49  | 14  | 76  |
| 13   | 44                       | 260                      | 26                       |                                     | 0.1        | 18 / 5 / 17                    | 12               | 62  | -3  | 37  |
| 14   | 535                      | 395                      |                          |                                     |            |                                |                  |     |     |     |
| 15   | 4520                     | 990                      |                          |                                     |            |                                |                  |     |     |     |
| 16   | 48                       | 80                       | 101                      |                                     | 0.4        | 17 / 5 / 10                    | 23               | 89  | 47  | 72  |
| 17   | 53                       | 145                      | 68                       |                                     | 0.1        | 26 / 5 / 27                    | -48              | 42  | -2  | 38  |
| 18   | 10                       | 16                       | 38                       |                                     | 0.3        | 12 / 3 / 6                     | -41              | 73  | 8   | 64  |
| 19   | 525                      | 250                      |                          |                                     |            |                                |                  |     |     |     |
| 20   | 110                      | 135                      | 6280                     |                                     |            |                                |                  |     |     |     |
| 21   | 230                      | 175                      | 9790                     |                                     |            |                                |                  |     |     |     |
| 22   | 47                       | 125                      | 75                       |                                     |            | 13 / 2 / 4                     | 46               | 41  | 47  | 34  |
| 23   | 54                       | 105                      | 43                       |                                     |            | 15 / 2 / 6                     | 91               | 84  | 53  | 62  |
| 24   | 700                      | 1145                     |                          |                                     |            |                                |                  |     |     |     |
| 25   | 335                      | 500                      |                          |                                     | 0.1        | 25 / 5 / 9                     | 96               | 95  | 67  | 86  |
| 26   | 260                      | 860                      |                          |                                     |            |                                |                  |     |     |     |
| 27   | 440                      | 1905                     |                          |                                     |            |                                |                  |     |     |     |
| 28   | 175                      | 315                      | 28                       |                                     | 28         | 36 / 4 / 11                    | -1               | 21  | 47  | 44  |
| 29   | 260                      | 385                      |                          |                                     | 0.4        | 20 / 5 / 9                     | 61               | 53  | 50  | 74  |
| 30   | 295                      | 660                      |                          |                                     |            |                                |                  |     |     |     |
| 31   | 145                      | 245                      | 8                        |                                     | 0.1        | 32 / 12 / 9                    | -9               | 31  | 10  | 18  |
| 32   | 1120                     | 860                      |                          |                                     |            |                                |                  |     |     |     |
| 33   | > 9900                   | 1195                     |                          |                                     |            |                                |                  |     |     |     |
| 34   | 295                      | 385                      |                          |                                     |            |                                |                  |     |     |     |
| 35   | 1195                     | 245                      |                          |                                     |            |                                |                  |     |     |     |
| 36   | 1565                     | 2955                     |                          |                                     |            |                                |                  |     |     |     |
| 37   | 1155                     | 2095                     |                          |                                     |            |                                |                  |     |     |     |
| 38   | 825                      | 1840                     |                          |                                     |            |                                |                  |     |     |     |
| 39   | 335                      | 630                      |                          |                                     |            |                                |                  |     |     |     |
| 40   | 520                      | 715                      |                          |                                     |            | 9 / 3 / 10                     | 97               | 96  | 79  | 86  |
| 41   | 430                      | 915                      |                          |                                     |            |                                |                  |     |     |     |
| 42   | 100                      | 320                      | < 1                      |                                     | 1.6        | 5 / 1 / 4                      | 30               | 44  | 67  | 60  |
| 43   | 50                       | 105                      | 4                        |                                     |            | 55 / 16 / 26                   | 90               | 91  | 80  | 88  |
| 44   | 80                       | 255                      | 6                        |                                     | 2.8        | 19 / 5 / 18                    |                  |     |     |     |
| 45   | 610                      | 335                      |                          |                                     |            |                                |                  |     |     |     |
| 46   | 520                      | 975                      |                          |                                     |            |                                |                  |     |     |     |
| 47   | 625                      | 1765                     |                          |                                     |            |                                |                  |     |     |     |
| 48   | 200                      | 660                      | 1040                     |                                     |            |                                |                  |     |     |     |

| Cmpd | CK1δ                     | CK1ε                     | MDA-<br>MB-231           | PAMPA                              | Solubility | Microsome<br>stability,<br>min | CYP % inhibition |     |     |     |
|------|--------------------------|--------------------------|--------------------------|------------------------------------|------------|--------------------------------|------------------|-----|-----|-----|
|      | IC <sub>50</sub><br>(nM) | IC <sub>50</sub><br>(nM) | EC <sub>50</sub><br>(nM) | P <sub>app</sub> ·10 <sup>-6</sup> | (μM)       | (H/M/R)                        | 1A2              | 2C9 | 2D6 | 3A4 |
| 49   | 175                      | 340                      | 60                       |                                    | 1.1        | 22 / 7 / 9                     | 91               | 92  | 62  | 85  |
| 50   | 42                       | 150                      | > 10000                  | < 0.1                              | 0.1        | 16 / 3 / -                     | 59               | 61  | 31  | -38 |
| 51   | 9                        | 115                      | > 10000                  | < 0.1                              | 0.1        | 30 / 9 / -                     | 66               | 52  | 42  | -12 |
| 52   | 215                      | 280                      | 1400                     | < 0.1                              |            |                                |                  |     |     |     |
| 53   | > 10000                  | > 10000                  |                          | < 0.1                              |            |                                |                  |     |     |     |
| 54   | > 10000                  | > 10000                  |                          | < 0.1                              |            |                                |                  |     |     |     |
| 55   | 245                      | 380                      | 1850                     | 0.3                                |            |                                |                  |     |     |     |
| 56   | 50                       | 54                       | 7160                     | 7.1                                |            |                                |                  |     |     |     |
| 57   | 180                      | 205                      | > 10000                  | 0.1                                |            |                                |                  |     |     |     |
| 58   | 85                       |                          | > 10000                  | 6.8                                |            |                                | 68               | 31  | 1   | -17 |
| 59   | 98                       |                          | > 10000                  |                                    |            |                                | 74               | 74  | 18  | 74  |
| 60   | 80                       |                          | 6460                     |                                    |            |                                |                  |     |     |     |
| 61   | 37                       |                          | > 10000                  |                                    |            | 6 / 2 / .                      | 37               | 35  | -12 | -31 |
| 62   | 89                       |                          | > 10000                  | < 0.1                              |            | 15 / 6 / -                     | 85               | 67  | 38  | -51 |
| 63   | 55                       | 170                      | 580                      |                                    |            |                                |                  |     |     |     |
| 64   | 76                       | 205                      | 185                      |                                    |            |                                |                  |     |     |     |
| 65   | 185                      | 310                      | 130                      |                                    |            |                                |                  |     |     |     |
| 66   | 175                      | 370                      | 145                      |                                    |            |                                |                  |     |     |     |
| 67   | 230                      | 205                      | 190                      |                                    |            |                                |                  |     |     |     |
| 68   | 69                       | 50                       | 130                      |                                    |            |                                |                  |     |     |     |
| 69   | 320                      | 375                      | 1290                     |                                    |            |                                |                  |     |     |     |
| 70   | 830                      | 1230                     | -                        |                                    |            |                                |                  |     |     |     |
| 71   | 915                      | 1310                     | -                        |                                    |            |                                |                  |     |     |     |
| 72   | 1030                     | 2010                     | -                        |                                    |            |                                |                  |     |     |     |
| 73   | 1180                     | 1200                     | 625                      |                                    |            |                                |                  |     |     |     |
| 74   | 160                      | 305                      | 175                      |                                    |            |                                |                  |     |     |     |
| 75   | 150                      | 265                      | 390                      |                                    |            |                                |                  |     |     |     |
| 76   | 620                      | 655                      | 195                      |                                    |            |                                |                  |     |     |     |

## Matrix of Compound Screen for compound 17

| Gene Symbol                | %Ctrl @ 10000nM |
|----------------------------|-----------------|
| ABL1(E255K)-phosphorylated | 93              |
| ABL1(T315I)-phosphorylated | 92              |
| ABL1-nonphosphorylated     | 97              |
| ABL1-phosphorylated        | 83              |
| ACVR1B                     | 86              |
| ADCK3                      | 87              |
| AKT1                       | 92              |
| AKT2                       | 91              |
| ALK                        | 95              |
| AURKA                      | 100             |
| AURKB                      | 91              |
| AXL                        | 82              |
| BMPR2                      | 99              |
| BRAF                       | 100             |
| BRAF(V600E)                | 100             |
| BTK                        | 100             |
| CDK11                      | 69              |
| CDK2                       | 97              |
| CDK3                       | 100             |
| CDK7                       | 46              |
| CDK9                       | 78              |
| CHEK1                      | 100             |
| CSF1R                      | 98              |
| CSNK1D                     | 5.2             |
| CSNK1G2                    | 95              |
| DCAMKL1                    | 100             |
| DYRK1B                     | 51              |
| EGFR                       | 95              |
| EGFR(L858R)                | 99              |
| EPHA2                      | 98              |
| ERBB2                      | 86              |
| ERBB4                      | 87              |
| ERK1                       | 100             |
| FAK                        | 85              |
| FGFR2                      | 90              |
| FGFR3                      | 85              |
| FLT3                       | 17              |
| GSK3B                      | 79              |
| IGF1R                      | 97              |
| IKK-alpha                  | 100             |
| IKK-beta                   | 94              |
| INSR                       | 93              |
| JAK2(JH1domain-catalytic)  | 91              |
| JAK3(JH1domain-catalytic)  | 100             |
| JNK1                       | 91              |
| JNK2                       | 83              |
| JNK3                       | 93              |
| KIT                        | 70              |

| Gene Symbol                | %Ctrl @ 10000nM |
|----------------------------|-----------------|
| KIT(D816V)                 | 100             |
| KIT(V559D,T670I)           | 98              |
| LKB1                       | 93              |
| MAP3K4                     | 62              |
| MAPKAPK2                   | 85              |
| MARK3                      | 81              |
| MEK1                       | 79              |
| MEK2                       | 91              |
| MET                        | 99              |
| MKNK1                      | 100             |
| MKNK2                      | 90              |
| MLK1                       | 98              |
| p38-alpha                  | 91              |
| p38-beta                   | 96              |
| PAK1                       | 81              |
| PAK2                       | 66              |
| PAK4                       | 96              |
| PCTK1                      | 59              |
| PDGFRA                     | 99              |
| PDGFRB                     | 56              |
| PDPK1                      | 71              |
| PIK3C2B                    | 100             |
| PIK3CA                     | 99              |
| PIK3CG                     | 100             |
| PIM1                       | 89              |
| PIM2                       | 94              |
| PIM3                       | 87              |
| PKAC-alpha                 | 85              |
| PLK1                       | 100             |
| PLK3                       | 95              |
| PLK4                       | 91              |
| PRKCE                      | 100             |
| RAF1                       | 99              |
| RET                        | 96              |
| RIOK2                      | 84              |
| ROCK2                      | 84              |
| RSK2(Kin.Dom.1-N-terminal) | 75              |
| SNARK                      | 93              |
| SRC                        | 78              |
| SRPK3                      | 80              |
| TGFBR1                     | 100             |
| TIE2                       | 73              |
| TRKA                       | 74              |
| TSSK1B                     | 66              |
| TYK2(JH1domain-catalytic)  | 98              |
| ULK2                       | 90              |
| VEGFR2                     | 99              |
| YANK3                      | 88              |
| ZAP70                      | 100             |

### %Ctrl Legend

|        |        |        |         |      |
|--------|--------|--------|---------|------|
| 0≤x<.1 | .1≤x<1 | 1≤x<10 | 10≤x<35 | x≥35 |
|--------|--------|--------|---------|------|
